# 1 Fatty acid bioconversion in harpacticoid copepods in a 2 changing environment: a transcriptomic approach

3  
4 Jens Boyen<sup>1\*</sup>, Patrick Fink<sup>2,3,4</sup>, Christoph Mensens<sup>1</sup>, Pascal I. Hablützel<sup>5</sup>,  
5 Marleen De Troch<sup>1</sup>

6 <sup>1</sup>Marine Biology, Department of Biology, Ghent University, Krijgslaan 281 – S8, 9000 Gent, Belgium

7 <sup>2</sup>Cologne Biocenter, University of Cologne, Zùlpicher Straße 47b, 50674 Köln, Germany

8 <sup>3</sup>Department Aquatic Ecosystem Analysis, Helmholtz Centre for Environmental Research, Brückstraße 3a, 39118  
9 Magdeburg, Germany

10 <sup>4</sup>Department River Ecology, Helmholtz Centre for Environmental Research, Brückstraße 3a, 39118 Magdeburg,  
11 Germany

12 <sup>5</sup>Flanders Marine Institute (VLIZ), Wandelaarkaai 7, 8400 Oostende, Belgium

13 ORCID: JB: 0000-0001-5005-7724; PF: 0000-0002-5927-8977; PIH: 0000-0002-6739-4994; MDT: 0000-0002-6800-  
14 0299

15  
16 **Keywords:** harpacticoid copepods, fatty acid metabolism, transcriptomics, global warming

---

## 18 Abstract

19  
20  
21 By 2100, global warming is predicted to significantly reduce the capacity of marine primary producers for long-  
22 chain polyunsaturated fatty acid (LC-PUFAs) synthesis. Primary consumers such as harpacticoid copepods  
23 (Crustacea) might mitigate the resulting adverse effects on the food web by increased LC-PUFA bioconversion.  
24 Here, we present a high-quality *de novo* transcriptome assembly of the copepod *Platychelipus littoralis*, exposed  
25 to changes in both temperature (+3°C) and dietary LC-PUFA availability. Using this transcriptome, we detected  
26 multiple transcripts putatively encoding for LC-PUFA-bioconverting front-end fatty acid desaturases and  
27 elongases, and performed phylogenetic analyses to identify their relationship with sequences of other (crustacean)  
28 taxa. While temperature affected the absolute fatty acid concentrations in copepods, LC-PUFA levels remained  
29 unaltered even when copepods were fed a LC-PUFA-deficient diet. While this suggests plasticity of LC-PUFA  
30 bioconversion within *P. littoralis*, none of the front-end desaturase or elongase transcripts were found to be  
31 differentially expressed under the applied treatments. Nevertheless, the transcriptome presented here provides a  
32 sound basis for future ecophysiological research on harpacticoid copepods.  
33

## 34 Introduction

35  
36 Global climate change and the resulting increase in sea surface temperature over the past decades have profoundly  
37 impacted marine organisms and ecosystems (1). This trend is likely to continue for the next decades, with a  
38 projected global mean sea surface temperature (SST) increase of 2.73°C by 2090-2099 compared to 1990-1999  
39 levels according to the business-as-usual Representative Concentration Pathway (RCP) 8.5 (2). This temperature  
40 rise affects the physiological performance and fitness of marine organisms and consequently triggers adverse  
41 changes in marine ecosystems as well as the goods and services they provide (3). Indeed, prominent climate-  
42 related shifts in nutrient and food supplies have already been observed in coastal areas worldwide (4,5). At the  
43 base of marine food webs, global warming is predicted to strongly impair the production of key nutritional fatty  
44 acids (FAs) by primary producers such as diatoms. These microalgae, like all living organisms, alter their FA  
45 composition due to temperature-dependent cell membrane restructuring, a process known as homeoviscous  
46 adaptation (6,7). Proportions of long-chain polyunsaturated FAs (LC-PUFAs) such as eicosapentaenoic acid  
47 (20:5 $\omega$ 3, EPA) and docosahexaenoic acid (22:6 $\omega$ 3, DHA) are predicted to decrease in microalgae taxa, and global  
48 EPA production by diatoms is estimated to decline by about 6 % by 2100 (7). This results in a reduced LC-PUFA  
49 availability for higher trophic levels, many of which strongly rely on dietary LC-PUFAs to fulfil their metabolic  
50 requirements (5). Given the important role of LC-PUFAs in structural and physiological processes and as  
51 precursors for hormones and signalling molecules (8), a reduced dietary LC-PUFA availability impacts growth,  
52 fecundity and fitness of consumers (9,10). The relative contributions of the direct (increased SST) and the indirect  
53 (decreased dietary LC-PUFA availability) effect of global warming on higher trophic levels remains yet  
54 understudied (11). Growth and FA composition of European sea bass *Dicentrarchus labrax* and European abalone  
55 *Haliotis tuberculata* were impacted by temperature but only to a lesser extent by diet (12,13). This lesser  
56 dependency on dietary LC-PUFAs was attributed to the endogenous bioconversion of short-chain saturated FAs

---

\*Author for correspondence (jens.boyen@ugent.be).

57 into LC-PUFAs. Numerous animal species, many of which aquatic invertebrates, are known to have at least some  
58 capacity for LC-PUFA bioconversion to cope with dietary changes (14,15). Benthic harpacticoid copepods  
59 (Crustacea) are key primary consumers in (coastal) marine and estuarine sediments (16) and are known for their  
60 capacity for LC-PUFA bioconversion (17–20). Coastal and estuarine environments undergo strong and stochastic  
61 fluctuations in temperature and nutrient availability. Harpacticoid copepods already adapted to such environments  
62 might be able to cope with the effects of global warming due to their LC-PUFA bioconversion capacity (18).  
63 However, the environmental shifts driving this bioconversion are yet poorly understood (15). Insights in the  
64 molecular aspects of LC-PUFA bioconversion are therefore required to understand this pivotal toolbox in  
65 crustaceans.

66 Converting short-chain saturated FAs to LC-PUFAs is achieved by a series of desaturase and elongase enzymes,  
67 which introduce a double bond or add two C-atoms to the FA chain, respectively (15). Desaturase enzymes  
68 themselves can be split up in front-end and methyl-end (or  $\omega$ -end) desaturases, depending on the location of the  
69 double bond insertion (21). For crustaceans, genes encoding for front-end desaturase and elongase enzymes were  
70 so far mainly detected in decapods (22–26). Interestingly, a recent study discovered genes encoding  $\omega$ -end  
71 desaturases in many aquatic invertebrates including some orders of copepods, challenging the current dogma that  
72 *de novo* PUFA biosynthesis occurs exclusively in marine microbes (27). Nielsen et al. (2019) identified putative  
73 front-end desaturase genes in multiple copepod species (28). Understanding how changes in diet or temperature  
74 affect those genes at the transcriptomic (i.e. gene expression) level has so far only been investigated in cyclopoid  
75 copepods (28,29). Within the order of Harpacticoida, transcriptomic resources are so far only available from  
76 species of the rock pool inhabiting *Tigriopus* genus (30–33), which is extensively used in ecotoxicological  
77 assessments.

78 Given the ecological importance of benthic harpacticoid copepods at the plant-animal interface, there is a need to  
79 better characterize their physiological response to global change at the molecular level. To do so, we investigated  
80 the transcriptomic and FA-metabolic response of the benthic harpacticoid copepod *Platychelipus littoralis* (Brady,  
81 1880) towards both direct and indirect effects of global warming within a multifactorial setting, combining a  
82 change in SST (current versus future scenario) with a change in the dietary LC-PUFA availability (LC-PUFA-rich  
83 diatoms versus LC-PUFA-deficient green algae as food sources (34,35)). *P. littoralis* is a common intertidal  
84 species in European estuaries, and temperature-dependent LC-PUFA turnover rates have been demonstrated  
85 previously using compound-specific stable isotope analysis, even within a short timeframe of six days (18). This  
86 study presents a high-quality *de novo* transcriptome assembly from *P. littoralis* and reveals differentially expressed  
87 (DE) genes and FA profile changes towards both diet and temperature. Furthermore, putative PUFA desaturase  
88 and elongase genes are identified and compared phylogenetically with genes of other crustacean species.  
89

## 90 Material and Methods

91

### 92 1. Experiment

93 *Nitzschia* sp. (strain DCG0421, Bacillariophyceae) and *Dunaliella tertiolecta* (Chlorophyceae) were obtained from  
94 the BCCM/DCG Diatoms Collection (hosted by the Laboratory for Protistology & Aquatic Ecology - Ghent  
95 University) and the Aquaculture lab - Ghent University, respectively. Both algae were non-axenically cultured at  
96  $15 \pm 1^\circ\text{C}$  in filtered (3  $\mu\text{m}$ ; Whatman Grade 6) and autoclaved natural seawater (FNSW), supplemented with  
97 Guillard's (F/2) Marine Water Enrichment solution (Sigma-Aldrich, Overijse, Belgium) and NutriBloom Plus  
98 (Necton) for *Nitzschia* sp. and *D. tertiolecta*, respectively. Food pellets were prepared through centrifugation and  
99 lyophilisation and stored at  $-80^\circ\text{C}$ . In parallel, quadruplicate algae samples were stored at  $-80^\circ\text{C}$  for later FA  
100 analysis, and filtered (Whatman GF/F) and lyophilized for particulate organic carbon determination. *Platychelipus*  
101 *littoralis* specimens were collected from the top sediment layer of the Paulina intertidal mudflat (Westerscheldt  
102 estuary, The Netherlands;  $51^\circ21'\text{N}$ ,  $3^\circ43'\text{E}$ ) in August 2018. After sediment sieving (250  $\mu\text{m}$ ) and decantation,  
103 live adults were randomly collected using a glass Pasteur pipette under a stereo microscope. Copepods were  
104 cleaned thrice by transferring them to Petri dishes with clean FNSW and were stored overnight to allow gut  
105 clearance prior to the start of the experiment.

106 The 10-day experiment had a fully crossed design with the factors temperature ( $19 \pm 1$  or  $22 \pm 1^\circ\text{C}$ ) and diet  
107 (*Nitzschia* sp. or *D. tertiolecta*). Temperature levels were based on the current mean August sea surface  
108 temperature at the sampling location (data obtained from [www.scheldemonitor.be](http://www.scheldemonitor.be)) and a global sea surface  
109 temperature increase of  $3^\circ\text{C}$  by 2100 as predicted by RCP8.5 (36). The food sources were offered as pre-thawed  
110 food pellets and under non-limiting food conditions ( $3,69 \pm 0,22 \text{ mg C ml}^{-1} \text{ day}^{-1}$  and  $5,10 \pm 1,16 \text{ mg C ml}^{-1} \text{ day}^{-1}$   
111 for *Nitzschia* sp. and *D. tertiolecta* respectively). The combinations of diet and temperature yielded four treatments,  
112 each consisting of Petri dishes (diameter of 52 mm) filled with 10 ml FNSW incubated in TC-175 incubators  
113 (Lovibond), with each treatment having four replicates for transcriptomic analysis (100 copepods per Petri dish)  
114 and three replicates for FA analysis (50 copepods per Petri dish). Each day, copepods were transferred to new units  
115 containing new temperature-equilibrated FNSW and were offered new pre-thawed food pellets. Triplicate copepod

116 samples (50 specimens each) were collected from the field similarly as the specimens used in the experiment, and  
117 were stored at  $-80^{\circ}\text{C}$  for analysis of the initial (field) FA composition. At the end of the experiment, mortality was  
118 assessed, and all live specimens were transferred to Petri dishes with clean FNSW to remove food particles from  
119 the cuticle. Copepods for transcriptomic analysis were immediately thereafter flash-frozen in liquid nitrogen and  
120 stored at  $-80^{\circ}\text{C}$ . Copepods for FA analysis were stored overnight to allow gut clearance prior to storage at  $-80^{\circ}\text{C}$ .  
121 Differences in copepod survival between diet and temperature treatments and due to density (100 vs. 50 copepods  
122 per Petri dish) was statistically assessed in R v.3.6.0 (37) using a type II three-way ANOVA, a Tukey normalization  
123 transformation, and a stepwise model selection by AIC.

124

## 125 2. FA analysis

126 FA methyl esters (FAMES) were prepared from lyophilized algal and copepod samples using a direct  
127 transesterification procedure with 2.5 % (v:v) sulfuric acid in methanol as described by De Troch et al. (17). The  
128 internal standard (nonadecanoic acid, Sigma-Aldrich, 2.5  $\mu\text{g}$ ) was added prior to the procedure. FAMES were  
129 extracted twice with hexane. FA composition analysis was carried out with a gas chromatograph (HP 7890B,  
130 Agilent Technologies, Diegem, Belgium) equipped with a flame ionization detector (FID) and connected to an  
131 Agilent 5977A Mass Selective Detector (Agilent Technologies, Diegem, Belgium). The GC was further equipped  
132 with a PTV injector (CIS-4, Gerstel, Mülheim an der Ruhr, Germany). A HP88 fused-silica capillary column  
133 (60m $\times$ 0.25mm $\times$ 0.20 $\mu\text{m}$  film thickness, Agilent Technologies) was used at a constant Helium flow rate (2 ml min<sup>-1</sup>).  
134 The injected sample (2  $\mu\text{l}$ ) was split equally between the MS and FID detectors using an Agilent capillary flow  
135 technology splitter. The oven temperature program was as follows: at the time of sample injection the column  
136 temperature was  $50^{\circ}\text{C}$  for 2 min, then gradually increased at  $10^{\circ}\text{C min}^{-1}$  to  $150^{\circ}\text{C}$ , followed by a second increase  
137 at  $2^{\circ}\text{C min}^{-1}$  to  $230^{\circ}\text{C}$ . The injector temperature was held at  $30^{\circ}\text{C}$  for 6 s and then ramped at  $10^{\circ}\text{C s}^{-1}$  to  $250^{\circ}\text{C}$  and  
138 held for 10 min. The transfer line for the column was maintained at  $250^{\circ}\text{C}$ . The quadrupole and ion source  
139 temperatures were 150 and  $230^{\circ}\text{C}$ , respectively. Mass spectra were recorded at 70 eV ionization voltage over the  
140 mass range of 50-550 m/z units.

141 Data analysis was done with MassHunter Quantitative Analysis software (Agilent Technologies). The signal  
142 obtained with the FID detector was used to generate quantitative data of all compounds. Peaks were identified  
143 based on their retention times, compared with external standards as a reference (Supelco 37 Component FAME  
144 Mix, Sigma-Aldrich) and by the mass spectra obtained with the Mass Selective Detector. FAME quantification  
145 was based on the area of the internal standard and on the conversion of peak areas to the weight of the FA by a  
146 theoretical response factor for each FA (38,39). Statistical analyses were performed in R v.3.6.0 (37). Shapiro-  
147 Wilk test and Levene's test were used to check for normal distribution and homoscedasticity. The non-parametric  
148 Wilcoxon rank sum test was used to test for the difference in absolute and relative concentration of the individual  
149 FA compounds between field and incubated copepods. The type II two-way ANOVA and the non-parametric  
150 Scheirer-Ray-Hare test were used to test for the effects of diet and temperature. Multivariate statistics were  
151 performed to test the effects of incubation, diet and temperature on the overall FA composition. Non-metric  
152 multidimensional scaling (nMDS), PERMANOVA and ANOSIM were performed after square root transformation  
153 (Bray-Curtis dissimilarity). Mean values are presented with  $\pm$  s.d. The FA shorthand notation A:B $\omega$ X is used,  
154 where A represents the number of carbon atoms, B the number of double bonds, and X the position of the first  
155 double bond counting from the terminal methyl group.

156

## 157 3. Transcriptomic analysis

158 Total RNA from 45 to 97 pooled *P. littoralis* specimens per sample was isolated using the RNeasy Plus Micro Kit  
159 (QIAGEN) following an improved protocol (See Supplementary Methods). Total RNA was extracted from all four  
160 replicates from the two *Nitzschia* sp. treatments, but due to high copepod mortality, only three out of four replicates  
161 from each of the two *D. tertiolecta* treatments could be used. Total RNA quality and quantity were assessed by  
162 both a NanoDrop 2000 spectrophotometer (Thermo Scientific) and a 2100 Bioanalyzer (Agilent Technologies).  
163 cDNA libraries were constructed using the Illumina TruSeq Stranded mRNA kit and samples were run on an  
164 Illumina HiSeq 4000 platform with 75 bp paired-end reads at the Cologne Centre for Genomics (University of  
165 Cologne).

166 Read quality was assessed using FASTQC v.0.11.7. The reads were quality-trimmed and adapter-clipped using  
167 Trimmomatic (40), and the raw read files are available at the NCBI Short Read Archive under BioProject  
168 PRJNA575120. The transcriptome was assembled *de novo* using Trinity v.2.8.4 (41) including *in silico* read  
169 normalization. Multiple tools were used to assess assembly quality. First, the percentages of reads properly  
170 represented in the transcriptome assembly were calculated for each sample using Bowtie2 v.2.3.4 (42). Second,  
171 the transcripts were aligned against proteins from the Swiss-Prot database (February 16, 2019) using blastx (cutoff  
172 of  $1e^{-20}$ ), and the number of unique proteins represented with full-length or nearly full length transcripts (>90 %)   
173 were determined. Third, we performed Benchmarking Universal Single-Copy Orthologs (BUSCO) v.3.1.0  
174 analysis using the arthropod dataset to estimate transcriptome assembly and annotation completeness (43). Lastly,  
175 both the N50 statistic and the E90N50 statistic (using only the set of transcripts representing 90 % of the total

176 expression data) were determined based on transcript abundance estimation using salmon v.0.12.0 following the  
177 quasi-mapping procedure (44). The transcripts were annotated using Trinotate (45), an open-source toolkit that  
178 compiles several analyses such as coding region prediction using TransDecoder (<http://transdecoder.github.io>),  
179 protein homology identification using BLAST and the Swiss-Prot database, protein domain identification using  
180 HMMER/Pfam (46,47), and gene annotation using EGGNOG, KEGG and Gene Ontology (GO) database  
181 resources (48–50). The transcriptome is available at the NCBI TSA Database under BioProject PRJNA575120.  
182 Transcript abundance per sample was estimated using salmon v.0.12.0 following the quasi-mapping procedure  
183 (44). The R v.3.0.6 (37) package edgeR v.3.26.4 (51) was used to identify significantly DE transcripts. Transcripts  
184 with >5 counts per million in at least three samples were retained. TMM normalization was applied (52), and  
185 differential expression was determined using a gene-wise negative binomial generalized linear model with quasi-  
186 likelihood F-tests (glmQLFit) with diet, temperature and the diet x temperature interaction as factors. Transcripts  
187 with an expression fold change  $\geq 2$  at a false discovery rate  $\leq 0.05$  (Benjamini-Hochberg method (53)) were  
188 considered significantly DE. The R package topGO v.2.36.0 (54) was used to test for enriched GO terms for both  
189 the diet and the temperature treatment. The enrichment tests were run using the weight01 algorithm and the  
190 Fisher's exact test statistic, with GO terms considered significantly enriched when  $p \leq 0.01$ .  
191 A transcript was categorized as encoding a front-end desaturase when it contained the two essential Pfam domains  
192 *Cytb5* (PF00173) and *FA\_desaturase* (PF00487), three diagnostic histidine boxes (HXXXH, HXXXHH, and  
193 QXXHH) and a heme-binding motif (HPGG) (21). A transcript was categorized as encoding an elongase when it  
194 contained the Pfam domain *ELO* (PF01151) and the diagnostic histidine box (HXXHH) (21). Nucleotide coding  
195 sequences of the transcripts were aligned using MAFFT v7.452 (55) with default parameters and were trimmed to  
196 conserved regions. Sequences that aligned badly, contained long indels or were identical to other sequences after  
197 trimming were removed. Additional well-annotated crustacean sequences found to be most closely related to each  
198 of the *P. littoralis* transcripts through blastx were added to the alignment. We also included putative desaturase  
199 and elongase genes from the hydrozoan *Hydra vulgaris* and two  $\omega$ -end desaturase sequences from the copepods  
200 *Lepeophtheirus salmonis* and *Caligus rogercresseyi* (27). For each gene family, an unrooted maximum likelihood  
201 phylogenetic tree was built using RAxML v.8.2.4 (56) with a General Time Reversible model of nucleotide  
202 substitution and CAT approximation. The final tree was rooted (midpoint), visualized and edited with FigTree  
203 v.1.4.3 (<http://tree.bio.ed.ac.uk/software/figtree>).  
204

## 205 Results

206  
207 The two algal diets differed in their FA composition (Table S1). EPA and DHA were highly abundant in *Nitzschia*  
208 sp. ( $26.85 \pm 2.26\%$  and  $5.68 \pm 0.29\%$ ) while not detected in *D. tertiolecta*. On the contrary *D. tertiolecta* exhibited  
209 a high content of  $\alpha$ -linolenic acid (ALA,  $18:3\omega3$ ;  $43.77 \pm 1.29\%$ ) compared to *Nitzschia* sp. ( $0.05 \pm 0.03\%$ ).  
210 Mean copepod survival after ten days was  $75.46 \pm 27.79\%$ . Besides high variation between replicates, no  
211 significant effects of diet, temperature, density or interactions on copepod survival were detected (AIC = 1696.8;  
212  $F_{(7,20)} = 1.382$ ;  $p = 0.2665$ ).  
213

### 214 1. Changes in FA content and composition

215 At the end of the experiment, total FA content in copepods in the treatments ( $149.47 \pm 21.37$  ng copepod<sup>-1</sup>) declined  
216 compared to control values from the field ( $197.29 \pm 4.50$  ng copepod<sup>-1</sup>) ( $p = 4.4e^{-3}$ ). Overall FA composition of  
217 the field copepods was significantly distinct from the ones of the incubated copepods ( $F_{(1,14)} = 10.83$ ;  $p = 3.0e^{-3}$ )  
218 (Fig. 1). In the experiment, overall copepod FA composition was significantly affected by temperature ( $F_{(1,11)} =$   
219  $4.30$ ;  $p = 0.015$ ) but not by diet ( $F_{(1,11)} = 1.83$ ;  $p = 0.13$ , no interaction) (Fig. 1). This effect was further shown by  
220 ANOSIM (temperature:  $R = 0.29$ ,  $p = 0.04$ ; diet:  $R = 0.08$ ,  $p = 0.19$ ). Temperature but not diet significantly affected  
221 total FA content, which was lower at 22°C compared to 19°C (Fig. 2, Table S2). Temperature but not diet also  
222 significantly affected absolute concentrations of anteiso-15:0, 15:0, 16:0, 18:1 $\omega$ 11c, 24:0, DHA and  $\Sigma$ MUFA,  
223 which were all lower at 22°C (Table S2). The diet only significantly affected the absolute ALA concentration,  
224 with copepods fed the ALA-rich diet *D. tertiolecta* having a higher absolute ALA concentration compared with  
225 copepods fed with *Nitzschia* sp. (Fig. 2, Table S2). A significant temperature x diet interaction was found for oleic  
226 acid (OA, 18:1 $\omega$ 9c). Absolute OA concentration was higher at 19°C when fed *Nitzschia* sp., an effect that reversed  
227 (higher at 22°C) when fed *D. tertiolecta* (Fig. 2, Table S2).  $\Sigma$ PUFA,  $\Sigma$ SFA, or important LC-PUFAs such as EPA  
228 and ARA were affected by neither temperature nor diet. Despite the absence of EPA and DHA in *D. tertiolecta*,  
229 copepods fed this diet were able to maintain similar relative EPA and DHA concentrations as in copepods fed with  
230 *Nitzschia* sp. (Table S3).  
231

### 232 2. Transcriptome assembly and annotation

233 We sequenced 14 *P. littoralis* samples resulting in nearly 400 million paired-end Illumina reads. After quality  
234 filtering, an assembly was generated consisting of 287,753 transcript contigs (Table 1).  $97.80 \pm 0.44\%$  of the reads



235 of each sample mapped back to the assembly, with  $95.95 \pm 0.68$  % mapping as properly paired reads (aligning  
236 concordantly at least once). 7,088 proteins from the Swiss-Prot database were represented by transcripts with  
237 >90 % alignment coverage. 97.9 % of the BUSCO arthropod genes were represented by at least one complete copy  
238 (single: 26.1 %, duplicated: 71.8 %, fragmented: 1.1 %). The N50 and the E90N50 metrics were 1,360 and 2,657  
239 respectively, and 90 % of the total expression data was represented by 35,540 transcripts. TransDecoder identified  
240 296,142 putative open reading frame coding regions within the assembly, suggesting at least some transcripts  
241 contain multiple coding regions (Table 1). About a quarter of those putative ORFs were annotated with GO (24.9  
242 %), KEGG (22.8 %) or EGNORG terms (16.0 %) or were found to contain at least one Pfam protein family domain  
243 (29.5 %, Table 1).

244

### 245 3. Differential expression and gene set enrichment analysis

246 After filtering out low expression transcripts, 24,202 transcripts were retained for DE analysis. Seven transcripts  
247 were DE between the two diet treatments (Fig. 3a,b, Table S4). Four of them were upregulated when copepods  
248 were fed with *Nitzschia* sp., while three were upregulated when copepods were fed with *D. tertiolecta*. 29  
249 transcripts were DE between the two temperature treatments (Fig. 3c,d, Table S4). Five transcripts were  
250 upregulated at 19°C, while 24 were upregulated at 22°C. Four transcripts were DE in both treatments. All but two  
251 DE transcripts contained at least one putative ORF. Gene set enrichment analysis using topGO identified 22 and  
252 30 enriched GO terms under the diet and temperature treatment, respectively (Table S5). Notable enriched  
253 functions in both treatments are related to microtubuli and cilia organization (Table S5). Certain terms detected in  
254 both treatments and primarily related to the biological process “glycerophospholipid biosynthetic process” and the  
255 molecular function “transferring acyl groups” (Table S5), were all attributed to the transcript  
256 *Plit\_DN1805\_c0\_g1\_i18*, which was downregulated when fed *D. tertiolecta* (compared to *Nitzschia* sp.) and  
257 upregulated at 22°C (compared to 19°C, Fig. 3, Table S4, S5). This transcript contains six ORFS which, according  
258 to blastx, match against the chicken protein acetoacetyl-CoA synthetase and the human protein glycerol-3-  
259 phosphate acyltransferase, both involved in the phospholipid metabolism.

260

### 261 4. Identification and phylogenetic analysis of desaturase and elongase genes

262 Respectively 22 and 17 unique putative front-end desaturase and elongase sequences exhibiting all diagnostic  
263 characteristics were identified in the *P. littoralis* transcriptome. The phylogenetic analysis of the front-end  
264 desaturase sequences identified two distinct clades, while  $\omega$ -end desaturases were not detected when filtering on  
265 the above-mentioned characteristics (Fig. 4a). Front-end desaturase sequences from the other crustacean taxa fell  
266 all in one clade, while the second clade contained exclusively *P. littoralis* sequences. The *H. vulgaris* desaturase  
267 and the two  $\omega$ -end desaturase formed a monophyletic clade (Fig. 4a). The phylogenetic analysis of the elongase  
268 sequences also identified two well supported clades, however in this case the *H. vulgaris* elongase sequence was  
269 not distinct from *P. littoralis* sequences (Fig. 4b). Elongase sequences from different crustacean taxa, including  
270 three *Daphnia magna* sequences, were spread throughout the tree, indicating that several gene duplication events  
271 predate the origin of copepods.

272

## 273 Discussion

274

275 Several earlier studies indicated that harpacticoid copepods have a strong capacity for endogenous LC-PUFA  
276 bioconversion (17,18,20). Meanwhile, our knowledge on the molecular pathways underlying this process is still  
277 limited (15). Considering a global SST increase and a decline in LC-PUFA production by primary consumers  
278 within this century (7), LC-PUFA bioconversion potentially plays a unique role for primary consumers to  
279 physiologically mitigate the negative effects of climate change. We showed that when fed with the LC-PUFA-  
280 deficient *D. tertiolecta*, *P. littoralis* had the physiological plasticity to maintain LC-PUFA levels relatively similar  
281 to copepods fed with *Nitzschia* sp. The high abundance of ALA in *D. tertiolecta* likely counteracts the lack of LC-  
282 PUFA, since *P. littoralis* is able to use ALA as a precursor for desaturation and elongation towards EPA and DHA  
283 (15). In contrast to diet, an increased SST of 3°C reduced the absolute total FA content, suggesting an increased  
284 use of storage fatty acids as energy providers (8). While the absolute concentrations of DHA and several  
285 monounsaturated fatty acids decreased, the relative concentrations of LC-PUFAs remained unaltered. These results  
286 therefore do not fully follow the theory of homeoviscous adaptation (6). This can probably be attributed to the  
287 limited temperature increase of 3°C in our experiment. An increased stress response at the upper limits of *P.*  
288 *littoralis*' thermal range could be more in line with the observed changes. Previous research reported an increased  
289 bioconversion of ARA and EPA after a temperature increases of 10°C to allow enhanced eicosanoid biosynthesis  
290 (18). These results thus clearly illustrate the importance of LC-PUFA bioconversion as a mechanism to cope with  
291 the direct and indirect effects of global warming. As such, fluctuations in temperature or food quality might be  
292 relatively less detrimental to *P. littoralis*, and its historical adaptation to a variable environment could have given  
293 this species useful adaptations to persist under future environmental changes.

294 The transcriptome presented here is the first available for a soft-sediment benthic non-model harpacticoid copepod.  
295 The high N50 metric (1,360) and high number of complete arthropod BUSCO genes (97.9 %) compared to other  
296 copepod transcriptomes (57) lead us to state that the transcriptome presented here is of high quality and can be  
297 confidently used for future studies. In our differential gene expression analysis, seven and 29 transcripts were  
298 found to be DE in the dietary and temperature contrasts, respectively. These relatively low numbers can be  
299 attributed to the low number of replicates used in the experiment (51). A gene set enrichment analysis identified  
300 GO terms mainly related to cytoskeleton organisation and phospholipid biosynthesis. Possible relations between  
301 temperature or dietary LC-PUFA availability and the cytoskeleton have been identified in mammals (58,59), yet  
302 further investigations on invertebrates are needed. GO terms related to phospholipid biosynthesis were all  
303 attributed to one transcript which was downregulated when *P. littoralis* was fed *D. tertiolecta* and upregulated at  
304 22°C, respectively. A temperature-driven reduction of membrane-bound phospholipid biosynthesis seems  
305 plausible (6) and is in line with both our own and previous findings (18) at the fatty acid level. It may be interpreted  
306 as increased mobilization of FAs for energy provision. The previous study however did not find membrane FA  
307 depletion when *P. littoralis* was fed the LC-PUFA deficient diet *D. tertiolecta* (18), thereby contradicting our  
308 findings at the transcriptional level. Furthermore, we identified a high number of transcripts putatively encoding  
309 for front-end desaturases and elongases. While we are aware that a *de novo* assembly may artificially introduce an  
310 inflated number of contigs (60), the sequences were sufficiently distinct to confidently state that they belong to  
311 different genes. It is indeed known that gene duplication is an important driver of the diversity of desaturase and  
312 elongase genes (61,62). We would therefore like to advance the hypothesis that an elevated front-end desaturase  
313 and elongase gene duplication frequency in harpacticoid copepods could be the key element for their high LC-  
314 PUFA bioconversion capacity. However, more stringent phylogenetic analyses are necessary to test this  
315 hypothesis. Here, we recognize two phylogenetic clades of putative front-end desaturases distinct from the two  
316 copepod  $\omega$ -end desaturases and the desaturase sequence from *H. vulgaris*. One clade contained exclusively *P.*  
317 *littoralis* sequences, indicating a novel clade that originated in harpacticoids. The phylogenetic tree of the elongase  
318 sequences indicated two distinct clades as well, separating transcripts similar to an Elov16-like *D. magna* sequence  
319 from other transcript, a result in line with earlier findings (26). Overall, our phylogenetic analyses of the front-end  
320 desaturase and elongase transcripts of *P. littoralis* provide a first glimpse at the high diversity of these genes and  
321 serve as a starting point to better comprehend the evolutionary history of LC-PUFA bioconversion within  
322 harpacticoid copepods.  
323 Interestingly, none of the identified transcripts encoding a front-end desaturase or elongase were found to be DE  
324 due to temperature or dietary LC-PUFA availability. This contradicts the stressor-driven LC-PUFA bioconversion  
325 evidenced at the fatty acid level. Possible reasons for why we did not find those transcripts to be DE would be the  
326 stringent filtering parameters used or the applied correction for multiple testing (53). A more gene-specific  
327 approach such as reverse transcriptase quantitative polymerase chain reaction (RT-qPCR) (63) might be better  
328 suited to analyse expression of LC-PUFA bioconversion genes following direct and indirect effects of global  
329 warming.  
330 In conclusion, we combined two approaches – FA profiling and *de novo* transcriptome assembly – to expand the  
331 current knowledge on LC-PUFA bioconversion in harpacticoids. This study shows that LC-PUFA levels in *P.*  
332 *littoralis* remain high even on a LC-PUFA-deficient diet, yet transcripts putatively encoding for front-end  
333 desaturases and elongases were not found to be upregulated. The molecular pathways underlying this mechanism  
334 are thus more complex than previously assumed (also demonstrated by the recent discovery of  $\omega$ -end desaturases  
335 in multiple aquatic invertebrates (27)) and might not happen at the gene expression level. The first *de novo*  
336 transcriptome of a non-model harpacticoid copepod presented here lays the foundation for more targeted  
337 ecophysiological research to investigate the molecular basis of adaptations to cope with the effects of global change.  
338

## 339 Acknowledgments

340  
341 This work was supported by the Special Research Fund of Ghent University through a starting grant  
342 (BOF16/STA/028) and a GOA grant (01GA2617) and carried out with infrastructure provided by EMBC  
343 Belgium (FWO GOH3817N).  
344

## 345 References

- 346
1. Doney SC, Ruckelshaus M, Emmett Duffy J, Barry JP, Chan F, English CA, et al. Climate Change Impacts on Marine Ecosystems. 2012; Ann Rev Mar Sci. 4:11–37. (10.1146/annurev-marine-041911-111611)
  2. Bopp L, Resplandy L, Orr JC, Doney SC, Dunne JP, Gehlen M, et al. Multiple stressors of ocean ecosystems in the 21st century: Projections with CMIP5 models. 2013; Biogeosciences. 10:6225–45. (10.5194/bg-10-6225-2013)
  3. Gattuso J-P, Magnan A, Bille R, Cheung WWL, Howes EL, Joos F, et al. Contrasting futures for ocean and society from different anthropogenic CO<sub>2</sub> emissions scenarios. 2015; Science. 349:aac4722. (10.1126/science.aac4722)
  4. Drinkwater KF, Beaugrand G, Kaeriyama M, Kim S, Ottersen G, Perry RI, et al. On the processes linking climate to ecosystem changes. 2010; J Mar Syst. 79:374–88. (10.1016/j.jmarsys.2008.12.014)

5. Litzow MA, Bailey KM, Prah FG, Heintz R. Climate regime shifts and reorganization of fish communities: the essential fatty acid limitation hypothesis. 2006; *Mar Ecol Prog Ser.* **315**:1–11. (10.3354/meps315001)
6. Sinensky M. Homeoviscous adaptation: a homeostatic process that regulates the viscosity of membrane lipids in *Escherichia coli*. 1974; *Proc Natl Acad Sci USA.* **71**:522–5. (10.1073/pnas.71.2.522)
7. Hixson SM, Arts MT. Climate warming is predicted to reduce omega-3, long-chain, polyunsaturated fatty acid production in phytoplankton. 2016; *Glob Chang Biol.* **22**:2744–55. (10.1111/gcb.13295)
8. Bell M V, Tocher DR. Biosynthesis of polyunsaturated fatty acids in aquatic ecosystems: General pathways and new directions. 2009. In: *Lipids in Aquatic Ecosystems*. Dordrecht: Springer; p. 211–36. (10.1007/978-0-387-89366-2\_9)
9. Müller-Navarra M. T. Brett, S. Park, S. Chandra, A. P. Ballantyne, E. Zorita, and C. R. Goldman DC. Unsaturated fatty acid content in seston and tropho-dynamic coupling in lakes. 2004; *Nature.* **427**:69–72. (10.1038/nature02210)
10. Caramujo MJ, Boschker HTS, Admiraal W. Fatty acid profiles of algae mark the development and composition of harpacticoid copepods. 2008; *Freshw Biol.* **53**:77–90. (10.1111/j.1365-2427.2007.01868.x)
11. von Elert E, Fink P. Global warming: Testing for direct and indirect effects of temperature at the interface of primary producers and herbivores is required. 2018; *Front Ecol Evol.* **6**:1–10. (10.3389/fevo.2018.00087)
12. Gourtay C, Chabot D, Audet C, Le Delliou H, Quazuguel P, Claireaux G, et al. Will global warming affect the functional need for essential fatty acids in juvenile sea bass (*Dicentrarchus labrax*)? A first overview of the consequences of lower availability of nutritional fatty acids on growth performance. 2018; *Mar Biol.* **165**:1–15. (10.1007/s00227-018-3402-3)
13. Hernández J, de la Parra AM, Lastra M, Viana MT. Effect of lipid composition of diets and environmental temperature on the performance and fatty acid composition of juvenile European abalone (*Haliotis tuberculata* L. 1758). 2013; *Aquaculture.* **412–413**:34–40. (10.1016/j.aquaculture.2013.07.005)
14. Monroig Ó, Tocher DR, Navarro JC. Biosynthesis of polyunsaturated fatty acids in marine invertebrates: Recent advances in molecular mechanisms. 2013; *Mar Drugs.* **11**:3998–4018. (10.3390/md11103998)
15. Monroig Ó, Kabeya N. Desaturases and elongases involved in polyunsaturated fatty acid biosynthesis in aquatic invertebrates: a comprehensive review. 2018; *Fish Sci.* **84**:911–28. (10.1007/s12562-018-1254-x)
16. Hicks GR., Coull BC. The ecology of marine meiobenthic harpacticoid copepods. 1983; *Oceanogr Mar Biol - An Annu Rev.* :67–175.
17. De Troch M, Boeckx P, Cnudde C, Van Gansbeke D, Vanreusel A, Vincx M, et al. Bioconversion of fatty acids at the basis of marine food webs: Insights from a compound-specific stable isotope analysis. 2012; *Mar Ecol Prog Ser.* **465**:53–67. (10.3354/meps09920)
18. Werbrouck E, Bodé S, Van Gansbeke D, Vanreusel A, De Troch M. Fatty acid recovery after starvation: insights into the fatty acid conversion capabilities of a benthic copepod (Copepoda, Harpacticoida). 2017; *Mar Biol.* **164**. (10.1007/s00227-017-3181-2)
19. Norsker NH, Støttrup JG. The importance of dietary HUFAs for fecundity and HUFA content in the harpacticoid, *Tisbe holothuriae* Humes. 1994; *Aquaculture.* **125**:155–66. (10.1016/0044-8486(94)90292-5)
20. Nanton DA, Castell JD. The effects of dietary fatty acids on the fatty acid composition of the harpacticoid copepod, *Tisbe* sp., for use as a live food for marine fish larvae. 1998; *Aquaculture.* **163**:251–61. (10.1016/S0044-8486(98)00236-1)
21. Hashimoto K, Yoshizawa AC, Okuda S, Kuma K, Goto S, Kanehisa M. The repertoire of desaturases and elongases reveals fatty acid variations in 56 eukaryotic genomes. 2008; *J Lipid Res.* **49**:183–91. (10.1194/jlr.M700377-jlr200)
22. Yang Z, Guo Z, Ji L, Zeng Q, Wang Y, Yang X, et al. Cloning and tissue distribution of a fatty acyl  $\Delta 6$ -desaturase-like gene and effects of dietary lipid levels on its expression in the hepatopancreas of Chinese mitten crab (*Eriocheir sinensis*). 2013; *Comp Biochem Physiol - B Biochem Mol Biol.* **165**:99–105. (10.1016/j.cbpb.2013.03.010)
23. Lin Z, Hao M, Zhu D, Li S, Wen X. Molecular cloning, mRNA expression and nutritional regulation of a  $\Delta 6$  fatty acyl desaturase-like gene of mud crab, *Scylla paramamosain*. 2017; *Comp Biochem Physiol Part - B Biochem Mol Biol.* **208–209**:29–37. (10.1016/j.cbpb.2017.03.004)
24. Wu DL, Huang YH, Liu ZQ, Yu P, Gu PH, Fan B, et al. Molecular cloning, tissue expression and regulation of nutrition and temperature on  $\Delta 6$  fatty acyl desaturase-like gene in the red claw crayfish (*Cherax quadricarinatus*). 2018; *Comp Biochem Physiol Part - B Biochem Mol Biol.* **225**:58–66. (10.1016/j.cbpb.2018.07.003)
25. Lin Z, Hao M, Huang Y, Zou W, Rong H, Wen X. Cloning, tissue distribution and nutritional regulation of a fatty acyl Elov14-like elongase in mud crab, *Scylla paramamosain* (Estampador, 1949). 2018; *Comp Biochem Physiol Part - B Biochem Mol Biol.* **217**:70–8. (10.1016/j.cbpb.2017.12.010)
26. Mah M, Kuah M, Yeat S, Merosha P, Janaranjani M, Goh P, et al. Molecular cloning, phylogenetic analysis and functional characterisation of an Elov17-like elongase from a marine crustacean, the orange mud crab (*Scylla olivacea*). 2019; *Comp Biochem Physiol Part B.* **232**:60–71. (10.1016/j.cbpb.2019.01.011)
27. Kabeya N, Fonseca MM, Ferrier DEK, Navarro JC, Bay LK, Francis DS, et al. Genes for de novo biosynthesis of omega-3 polyunsaturated fatty acids are widespread in animals. 2018; *Sci Adv.* **4**:1–9. (10.1126/sciadv.aar6849)
28. Nielsen BLH, Gøtterup L, Jørgensen TS, Hansen BW, Hansen LH, Mortensen J, et al. n-3 PUFA biosynthesis by the copepod *Apocyclops royi* documented using fatty acid profile analysis and gene expression analysis. 2019; *Biol Open.* **8**:bio038331. (10.1242/bio.038331)
29. Lee SH, Lee MC, Puthumana J, Park JC, Kang S, Han J, et al. Effects of temperature on growth and fatty acid synthesis in the cyclopoid copepod *Paracyclopsina nana*. 2017; *Fish Sci.* **83**:725–34. (10.1007/s12562-017-1104-2)
30. Kim HS, Lee BY, Han J, Lee YH, Min GS, Kim S, et al. De novo assembly and annotation of the Antarctic copepod (*Tigriopus kingsejongensis*) transcriptome. 2016; *Mar Genomics.* **28**:37–9. (10.1016/j.margen.2016.04.009)
31. Kim HS, Lee BY, Won EJ, Han J, Hwang DS, Park HG, et al. Identification of xenobiotic biodegradation and metabolism-related genes in the copepod *Tigriopus japonicus* whole transcriptome analysis. 2015; *Mar Genomics.* **24**:207–8. (10.1016/j.margen.2015.05.011)
32. De Biasse MB, Kawji Y, Kelly MW. Phenotypic and transcriptomic responses to salinity stress across genetically and geographically divergent *Tigriopus californicus* populations. 2018; *Mol Ecol.* **27**:1621–32. (10.1111/mec.14547)
33. Schoville SD, Barreto FS, Moy GW, Wolff A, Burton RS. Investigating the molecular basis of local adaptation to thermal stress: Population differences in gene expression across the transcriptome of the copepod *Tigriopus californicus*. 2012; *BMC Evol Biol.* **12**:170. (10.1186/1471-2148-12-170)
34. Renaud SM, Pary DL. Microalgae for use in tropical aquaculture. 2. Effect of salinity on growth, gross chemical composition and fatty acid composition of 3 species of marine microalgae. 1994; *J Appl Phycol.* **6**:347–56. (10.1007/bf02181949)
35. Volkman JK, Jeffrey SW, Nichols PD, Rogers GI, Garland CD. Fatty acid and lipid composition of ten species of microalgae used in mariculture. 1989; *J Exp Mar Biol Ecol.* **128**:219–40. (10.1016/0022-0981(89)90029-4)
36. Collins M, Knutti R, Arblaster J, Dufresne J-L, Fichet F, Friedlingstein P, et al. Long-term climate change: projections, commitments and irreversibility. 2013. In: *Climate Change 2013: The Physical Science Basis Contribution of Working Group I to the Fifth Assessment Report of the Intergovernmental Panel on Climate Change.* p. 1029–136. (10.1017/cbo9781107415324.024)
37. R Core Team. R: A language and environment for statistical computing [Internet]. 2019. Vienna, Austria: R Foundation for Statistical Computing
38. Ackman RG, Sipos JC. Application of specific response factors in the gas chromatographic analysis of methyl esters of fatty acids with flame ionization detectors. 1964; *J Am Oil Chem Soc.* **41**:377–8. (10.1007/bf02654818)
39. Wolff RL, Bayard CC, Fabien RJ. Evaluation of sequential methods for the



- determination of butterfat fatty acid composition with emphasis on trans-18:1 acids. Application to the study of seasonal variations in french butters. 1995; *J Am Oil Chem Soc.* **72**:1471–83. (10.1007/bf02577840)
40. Bolger AM, Lohse M, Usadel B. Trimmomatic: A flexible trimmer for Illumina sequence data. 2014; *Bioinformatics.* **30**:2114–20. (10.1093/bioinformatics/btu170)
41. Grabherr MG, Haas BJ, Yassour M, Levin JZ, Thompson DA, Amit I, et al. Full-length transcriptome assembly from RNA-Seq data without a reference genome. 2011; *Nat Biotechnol.* **29**:644–52. (10.1038/nbt.1883)
42. Langmead B, Salzberg SL. Fast gapped-read alignment with Bowtie 2. 2012; *Nat Methods.* **9**:357–9. (10.1038/nmeth.1923)
43. Simão FA, Waterhouse RM, Ioannidis P, Kriventseva E V., Zdobnov EM. BUSCO: Assessing genome assembly and annotation completeness with single-copy orthologs. 2015; *Bioinformatics.* **31**:3210–2. (10.1093/bioinformatics/btv351)
44. Patro R, Duggal G, Love MI, Irizarry RA, Kingsford C. Salmon provides fast and bias-aware quantification of transcript expression. 2017; *Nat Methods.* **14**:417–9. (10.1038/nmeth.4197)
45. Bryant DM, Johnson K, DiTommaso T, Tickle T, Couger MB, Payzin-Dogru D, et al. A Tissue-Mapped Axolotl De Novo Transcriptome Enables Identification of Limb Regeneration Factors. 2017; *Cell Rep.* **18**:762–76. (10.1016/j.celrep.2016.12.063)
46. Finn RD, Clements J, Eddy SR. HMMER web server: Interactive sequence similarity searching. 2011; *Nucleic Acids Res.* **39**:29–37. (10.1093/nar/gkr367)
47. El-Gebali S, Mistry J, Bateman A, Eddy SR, Luciani A, Potter SC, et al. The Pfam protein families database in 2019. 2019; *Nucleic Acids Res.* **47**:D427–32. (10.1093/nar/gky995)
48. Huerta-Cepas J, Szklarczyk D, Heller D, Hernández-Plaza A, Forslund SK, Cook H, et al. EggNOG 5.0: A hierarchical, functionally and phylogenetically annotated orthology resource based on 5090 organisms and 2502 viruses. 2019; *Nucleic Acids Res.* **47**:D309–14. (10.1093/nar/gky1085)
49. Kanehisa M, Goto S, Sato Y, Furumichi M, Tanabe M. KEGG for integration and interpretation of large-scale molecular data sets. 2012; *Nucleic Acids Res.* **40**:109–14. (10.1093/nar/gkr988)
50. The Gene Ontology Consortium, Ashburner M, Ball CA, Blake JA, Botstein D, Butler H, et al. Gene Ontology: tool for the unification of biology. 2000; *Nat Genet.* **25**:25–9. (10.1038/75556)
51. Robinson MD, McCarthy DJ, Smyth GK. edgeR: A Bioconductor package for differential expression analysis of digital gene expression data. 2009; *Bioinformatics.* **26**:139–40. (10.1093/bioinformatics/btp616)
52. Robinson MD, Oshlack A. A scaling normalization method for differential expression analysis of RNA-seq data. 2010; *Genome Biol.* **11**:R25. (10.1186/gb-2010-11-3-r25)
53. Benjamini Y, Hochberg Y. Controlling the False Discovery Rate: A Practical and Powerful Approach to Multiple Testing. 1995; *J R Stat Soc Ser B.* **57**:289–300. (10.1111/j.2517-6161.1995.tb02031.x)
54. Alexa A, Rahnenfuhrer J. topGO - Enrichment analysis for gene ontology. R package version 2.37.0 [Internet]. 2019. (10.18129/b9.bioc.topgo)
55. Katoh K, Standley DM. MAFFT multiple sequence alignment software version 7: Improvements in performance and usability. 2013; *Mol Biol Evol.* **30**:772–80. (10.1093/molbev/mst010)
56. Stamatakis A. RAxML version 8: A tool for phylogenetic analysis and post-analysis of large phylogenies. 2014; *Bioinformatics.* **30**:1312–3. (10.1093/bioinformatics/btu033)
57. Semmouri I, Asselman J, Van Nieuwerburgh F, Deforce D, Janssen CR, De Schampheleere KAC. The transcriptome of the marine calanoid copepod *Temora longicornis* under heat stress and recovery. 2018; *Mar Environ Res.* **143**:10–23. (10.1016/j.marenvres.2018.10.017)
58. Guzmán M, Velasco G, Geelen MJH. Do cytoskeletal components control fatty acid translocation into liver mitochondria? 2000; *Trends Endocrinol Metab.* **11**:49–53. (10.1016/s1043-2760(99)00223-4)
59. Røsjø C, Berg T, Manum K, Gjølven T, Magnusson S, Thomassen MS. Effects of temperature and dietary n-3 and n-6 fatty acids on endocytic processes in isolated rainbow trout (*Oncorhynchus mykiss*, Walbaum) hepatocytes. 1994; *Fish Physiol Biochem.* **13**:119–32. (10.1007/bf00004337)
60. Hölzer M, Marz M. De novo transcriptome assembly: A comprehensive cross-species comparison of short-read RNA-Seq assemblers. 2019; *Gigascience.* **8**:1–16. (10.1093/gigascience/giz039)
61. Surm JM, Toledo TM, Prentis PJ, Pavasovic A. Insights into the phylogenetic and molecular evolutionary histories of Fad and Elovl gene families in Actiniaria. 2018; *Ecol Evol.* **8**:5323–35. (10.1002/ece3.4044)
62. Ishikawa A, Kabeya N, Ikeya K, Kakioka R, Cech JN, Osada N, et al. A key metabolic gene for recurrent freshwater colonization and radiation in fishes. 2019; *Science (80- ).* **364**:886–9. (10.1126/science.aau5656)
63. Freeman WM, Walker SJ, Vrana KE. Quantitative RT-PCR: Pitfalls and potential. 1999; *Biotechniques.* **26**:112–25. (10.2144/99261r01)

## Figure and table captions

**Figure 1** Non-metric multidimensional scaling (Bray-Curtis dissimilarity) on absolute FA concentrations (ng copepod<sup>-1</sup>) of the four treatments and field samples. Ellipses indicate the 95 % confidence levels.

**Figure 2** Mean absolute fatty acid concentration (ng copepod<sup>-1</sup> ± s.d.; n=3) of *P. littoralis* prior (field) and after ten days of incubation with *Nitzschia* sp. or *D. tertiolecta*. **a** OA (18:1w9) **b** ALA (18:3w3) **c** DHA (22:6w3) **d** ∑FA (total fatty acid concentration).

**Table 1** Assembly and annotation characteristics of the *P. littoralis* transcriptome

**Figure 3** Heatmaps (**a,d**) and MA plots (**b,c**). MA plots show log fold change per transcript against its mean expression (in log counts per million) with diet (**b**) and temperature (**c**) as contrast. Red dots indicate significantly differentially expressed (DE) transcripts (i.e. log fold change>1 and false discovery rate<0.05). Black dots indicate non-significant DE transcripts. Heatmaps show relative expression level (Euclidean distance) of each significantly DE transcript in each sample with diet (**a**) and temperature (**d**) as contrast. Transcripts and samples are hierarchically clustered.

**Figure 4** Maximum likelihood phylogenetic trees with midpoint root comparing nucleotide sequences of putative front-end desaturase (**a**) and elongase (**b**) transcripts of *P. littoralis* with sequences of other crustaceans and the hydrozoan *Hydra vulgaris*. Values above branches show bootstrap support after 100 RAxML iterations. Red annotations below sequence codes show (predicted) functions in case indicated in GenBank.



## Tables

**Table 1**

| Assembly and annotation characteristics      | Value       |
|----------------------------------------------|-------------|
| <b>Assembly</b>                              |             |
| Number of raw reads                          | 395,794,835 |
| Average number of reads sample <sup>-1</sup> | 28,271,060  |
| Number of assembled bases (bp)               | 207,643,686 |
| Number of assembled contigs                  | 287,753     |
| Average contig length (bp)                   | 721.6       |
| Median contig length (bp)                    | 343         |
| GC content (%)                               | 47.54       |
| <b>Annotation</b>                            |             |
| Number of ORFs                               | 296,142     |
| ORFs with GO terms                           | 73,836      |
| ORFs with KEGG terms                         | 67,484      |
| ORFs with EGNNOG terms                       | 47,358      |
| ORFs with Pfam protein family                | 87,319      |

## Figures

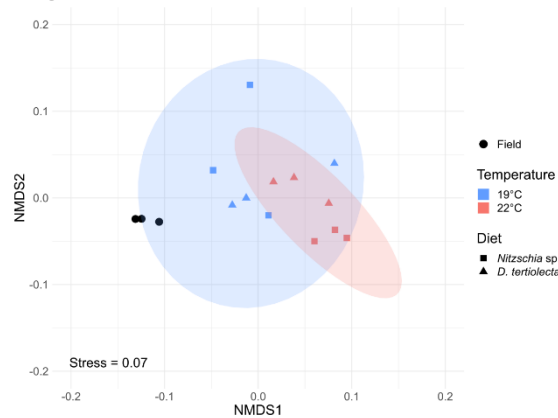

**Figure 1**

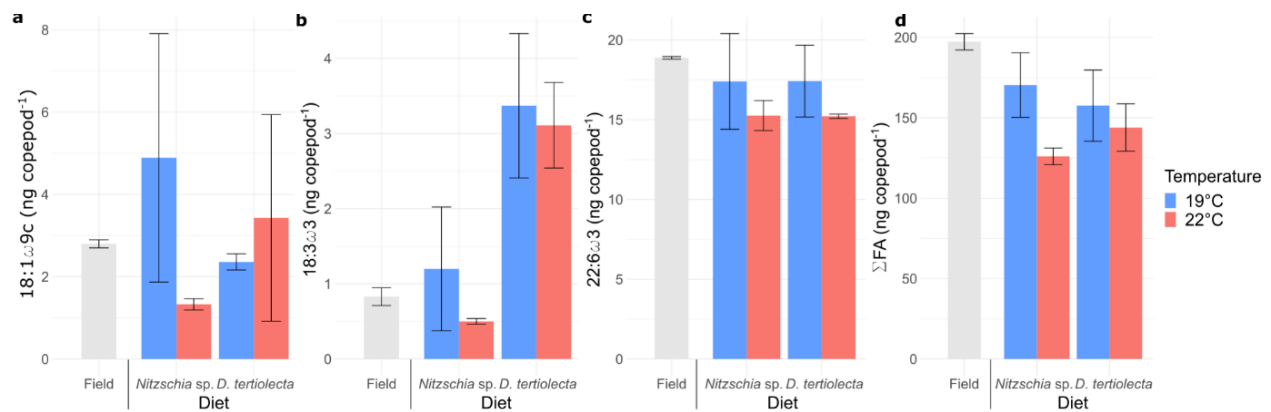

**Figure 2**

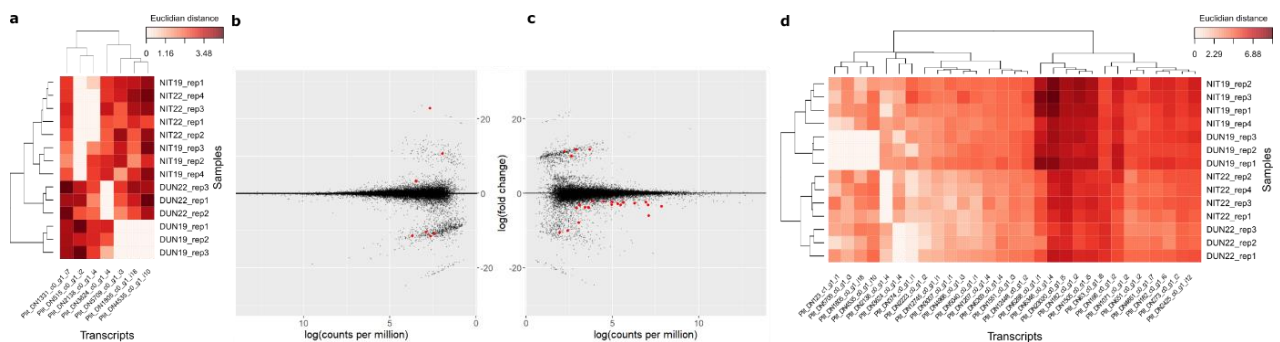

**Figure 3**

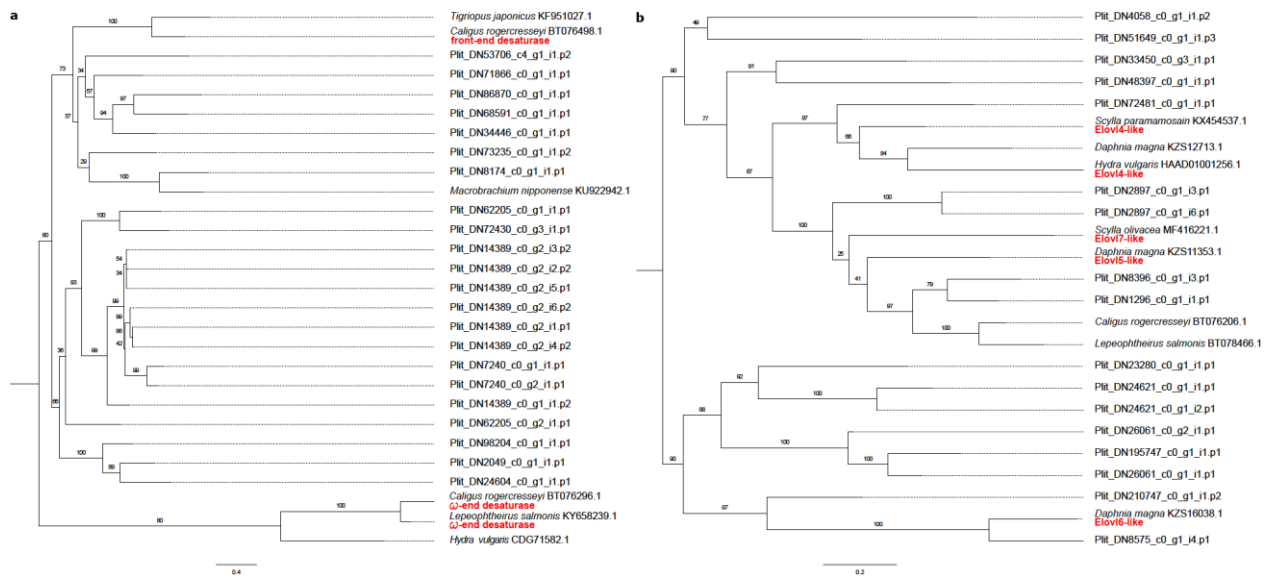

Figure 4

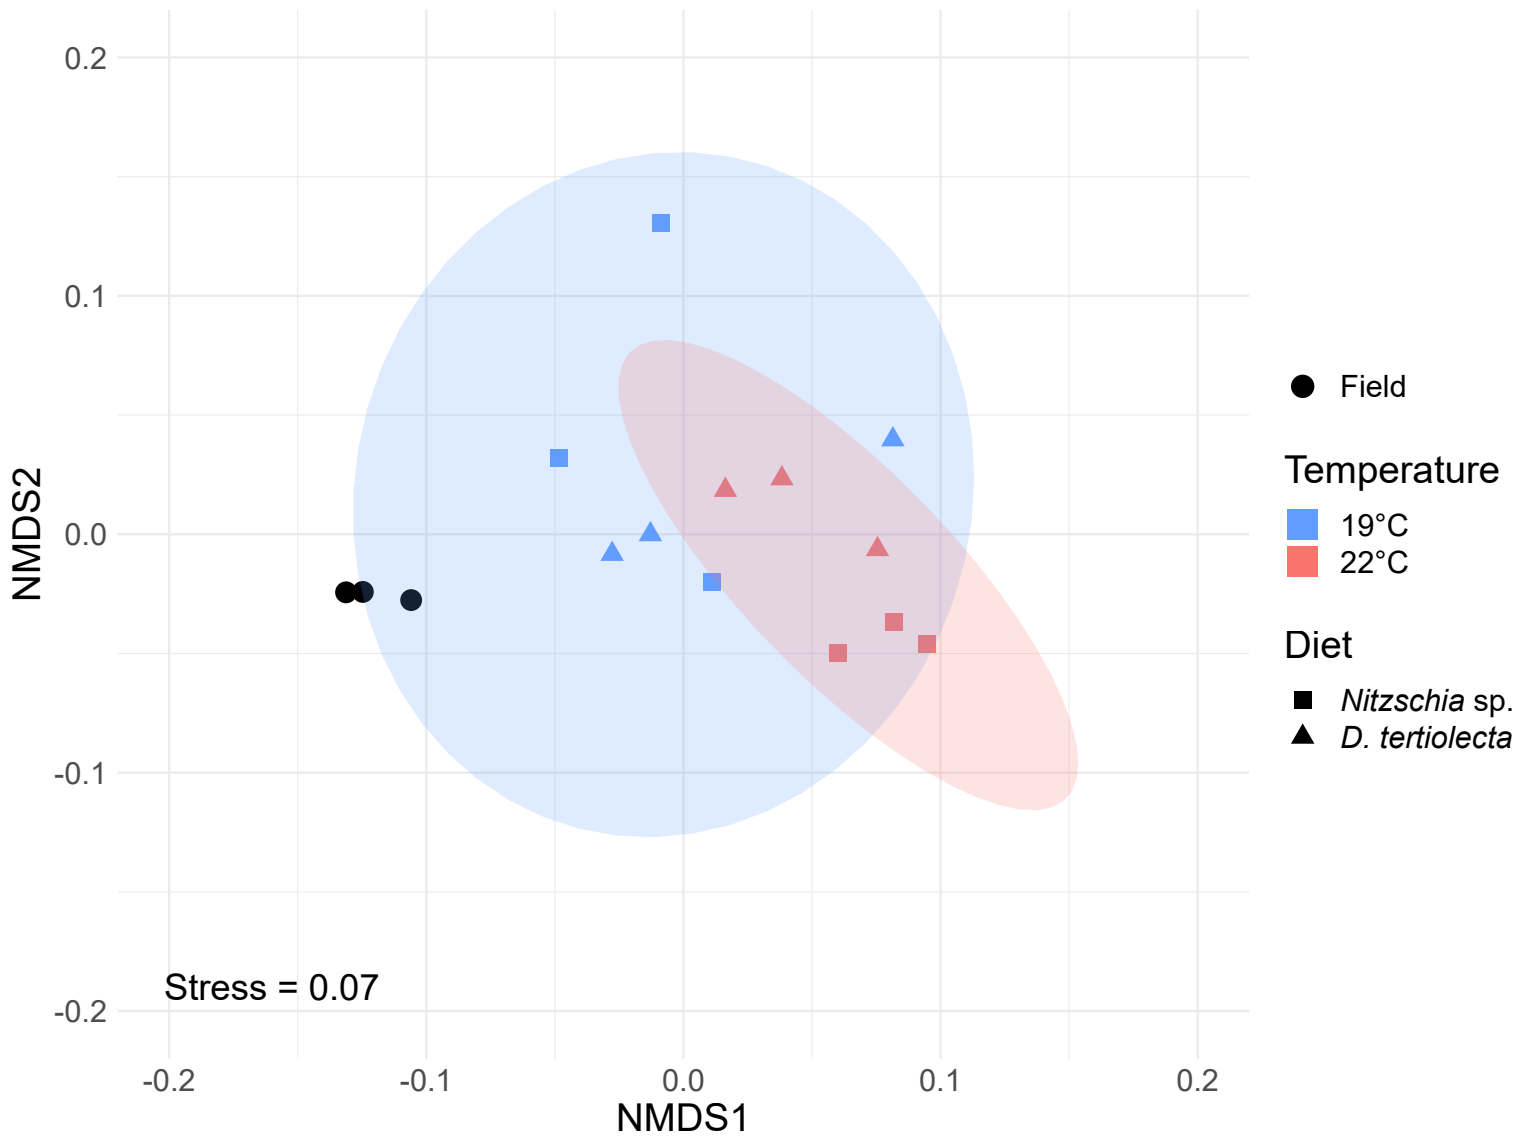



**a**18:1 $\omega$ 9c (ng copepod $^{-1}$ )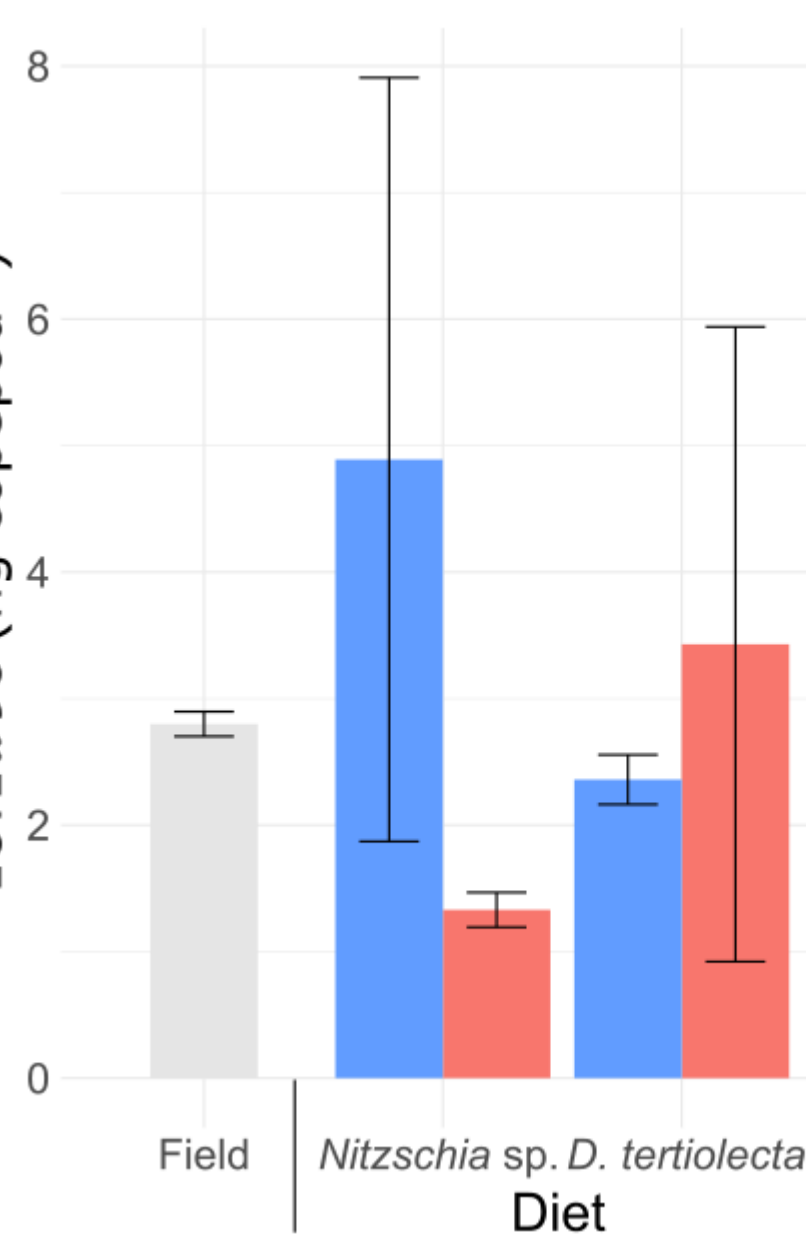**b**18:3 $\omega$ 3 (ng copepod $^{-1}$ )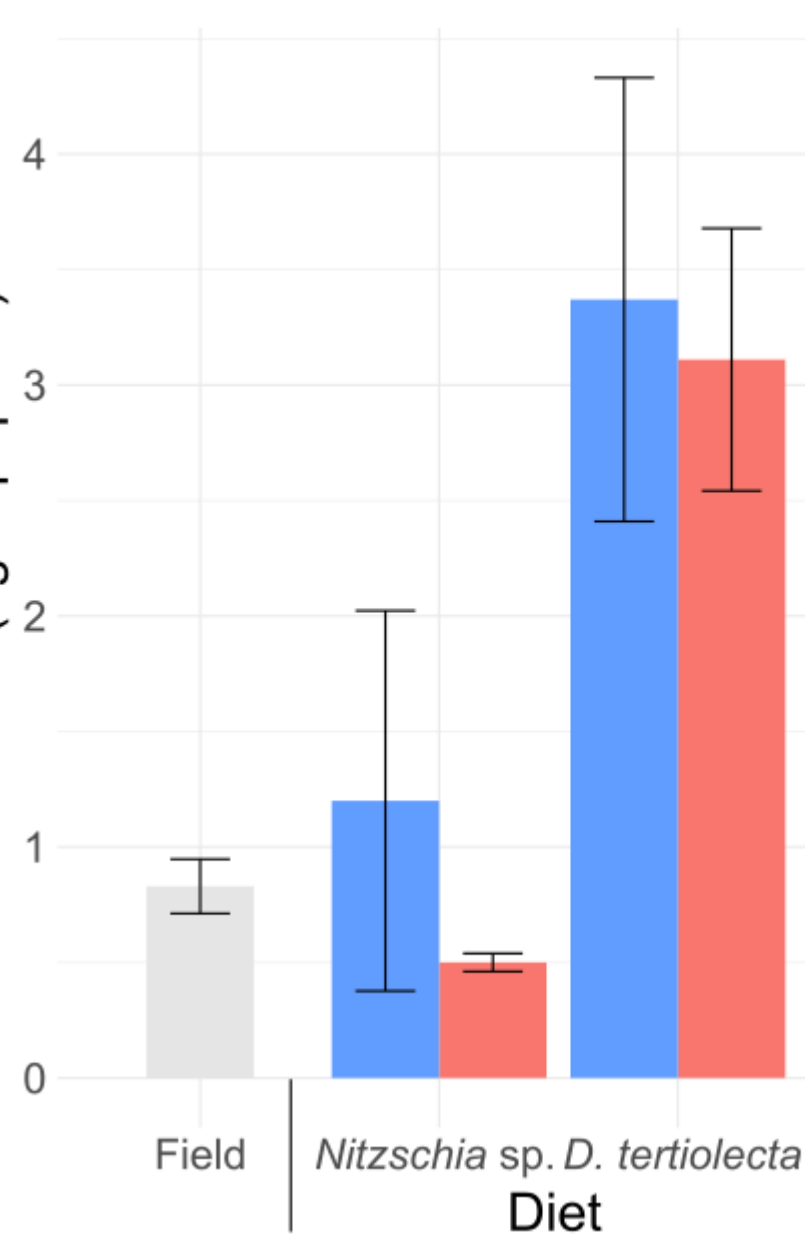**c**22:6 $\omega$ 3 (ng copepod $^{-1}$ )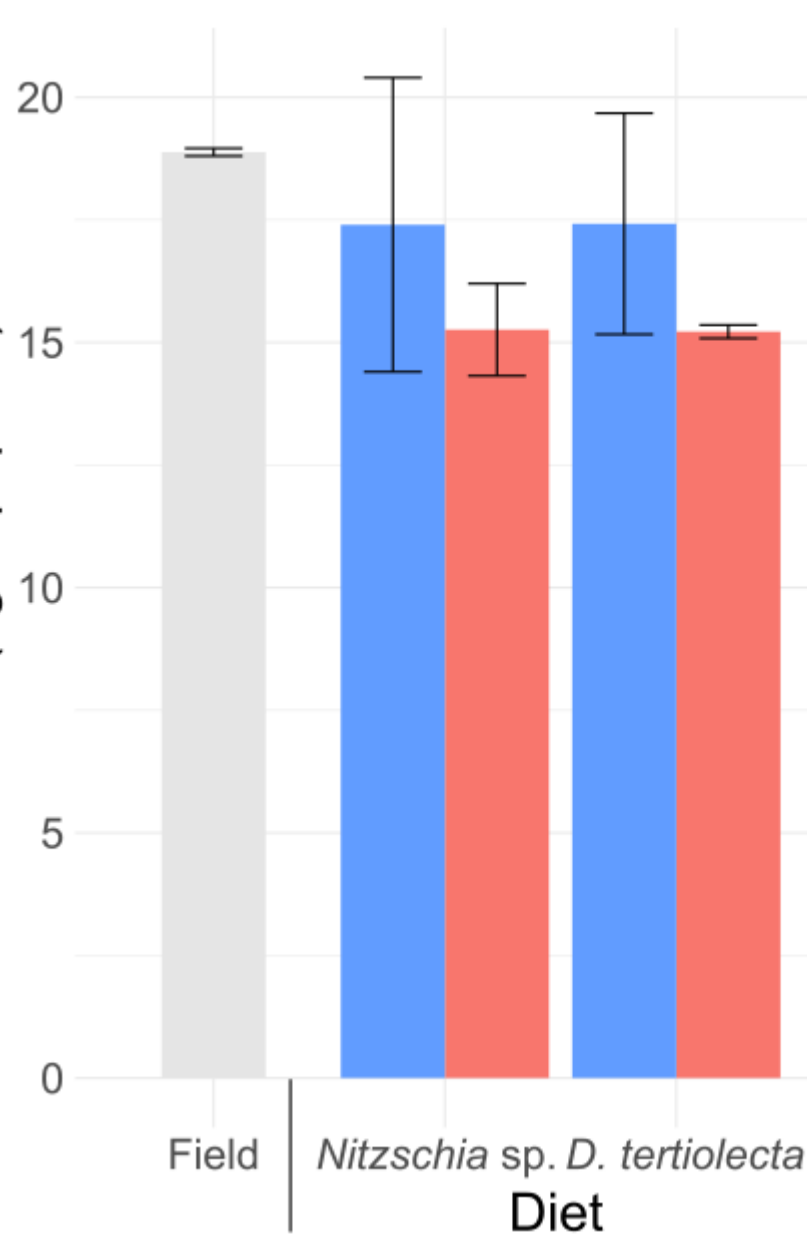**d** $\Sigma$ FA (ng copepod $^{-1}$ )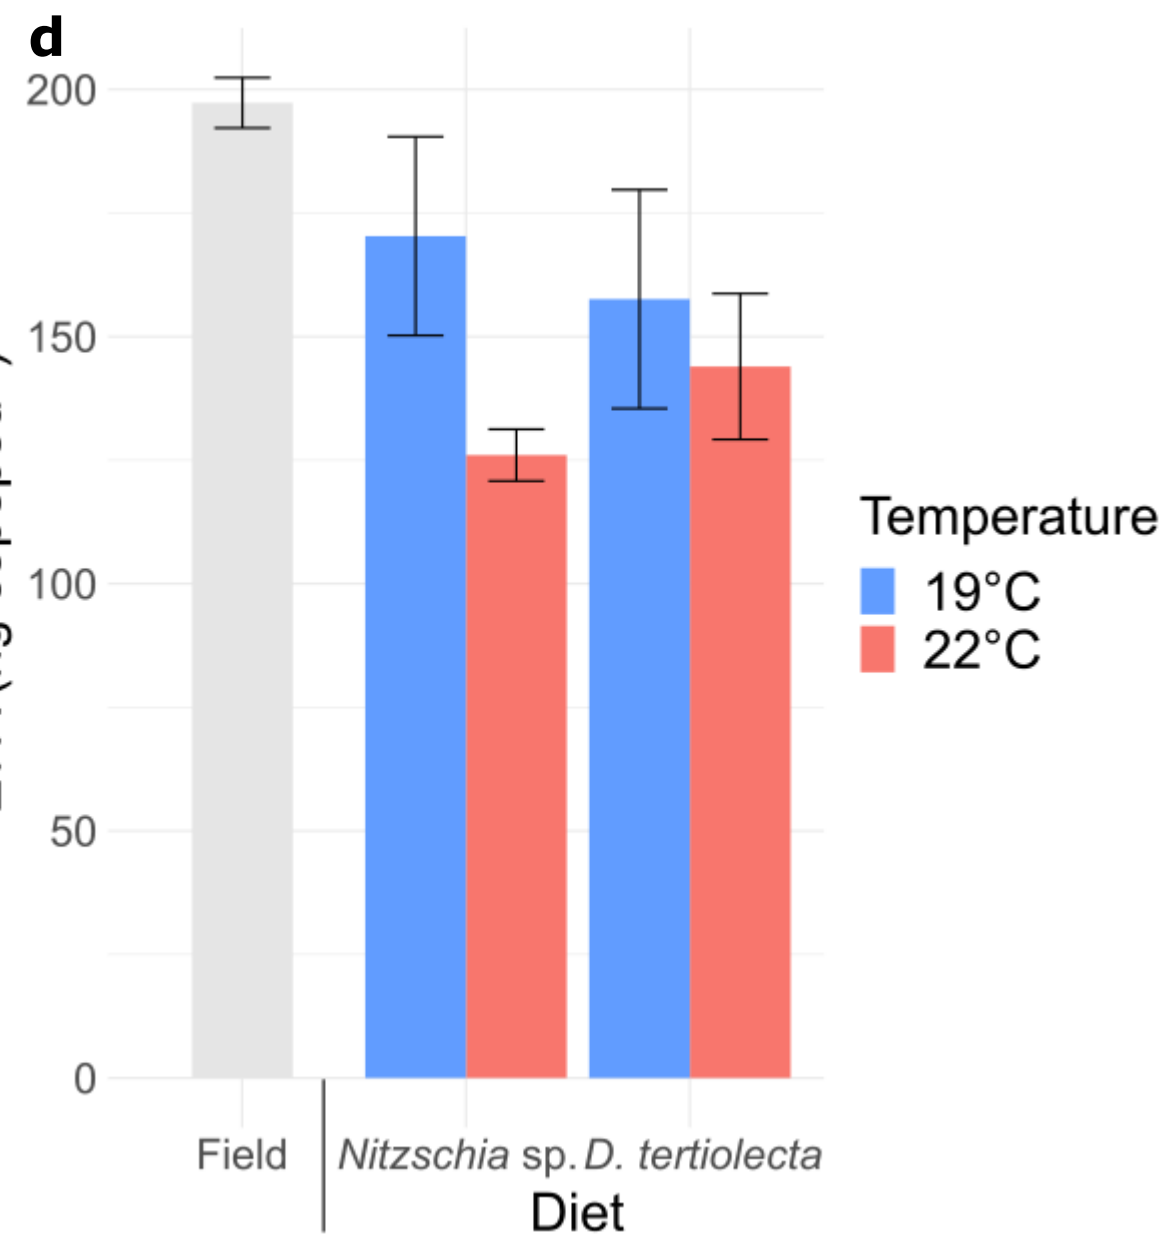

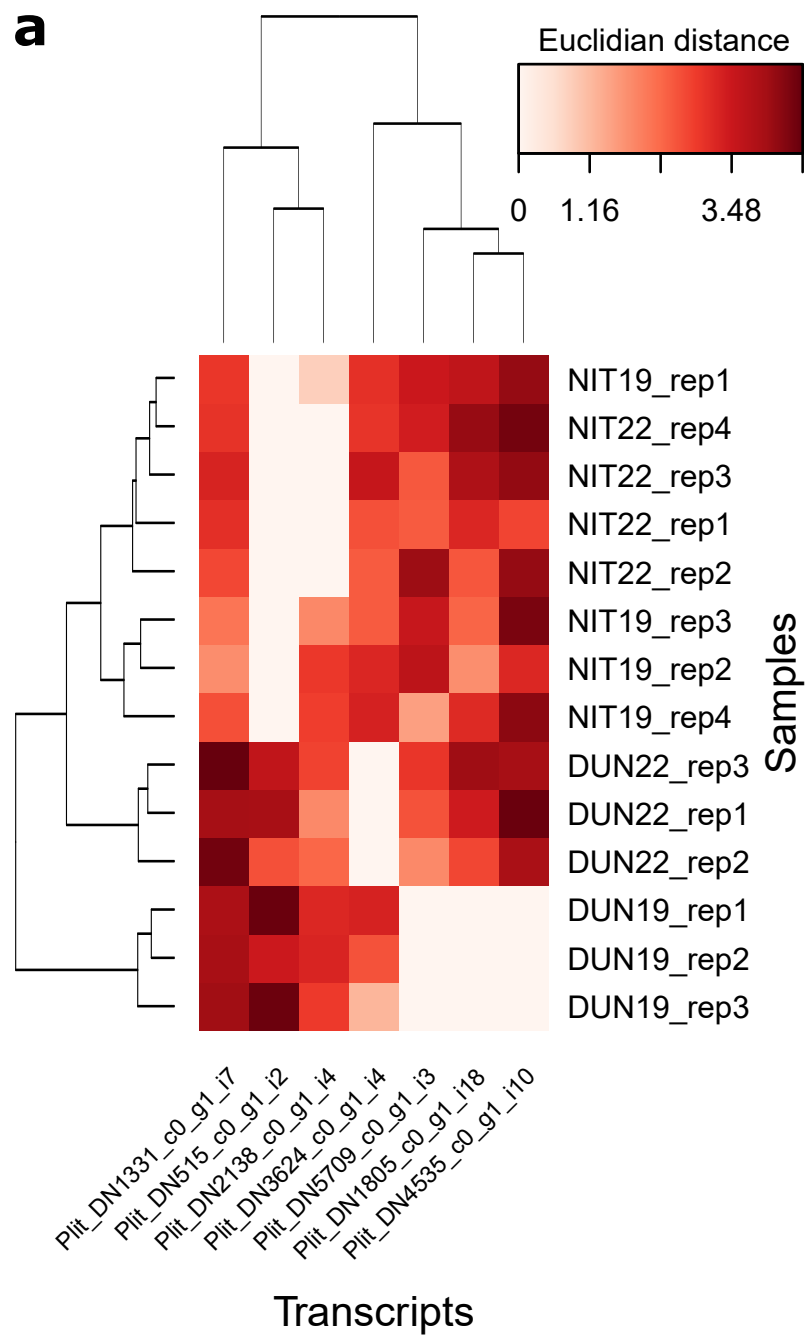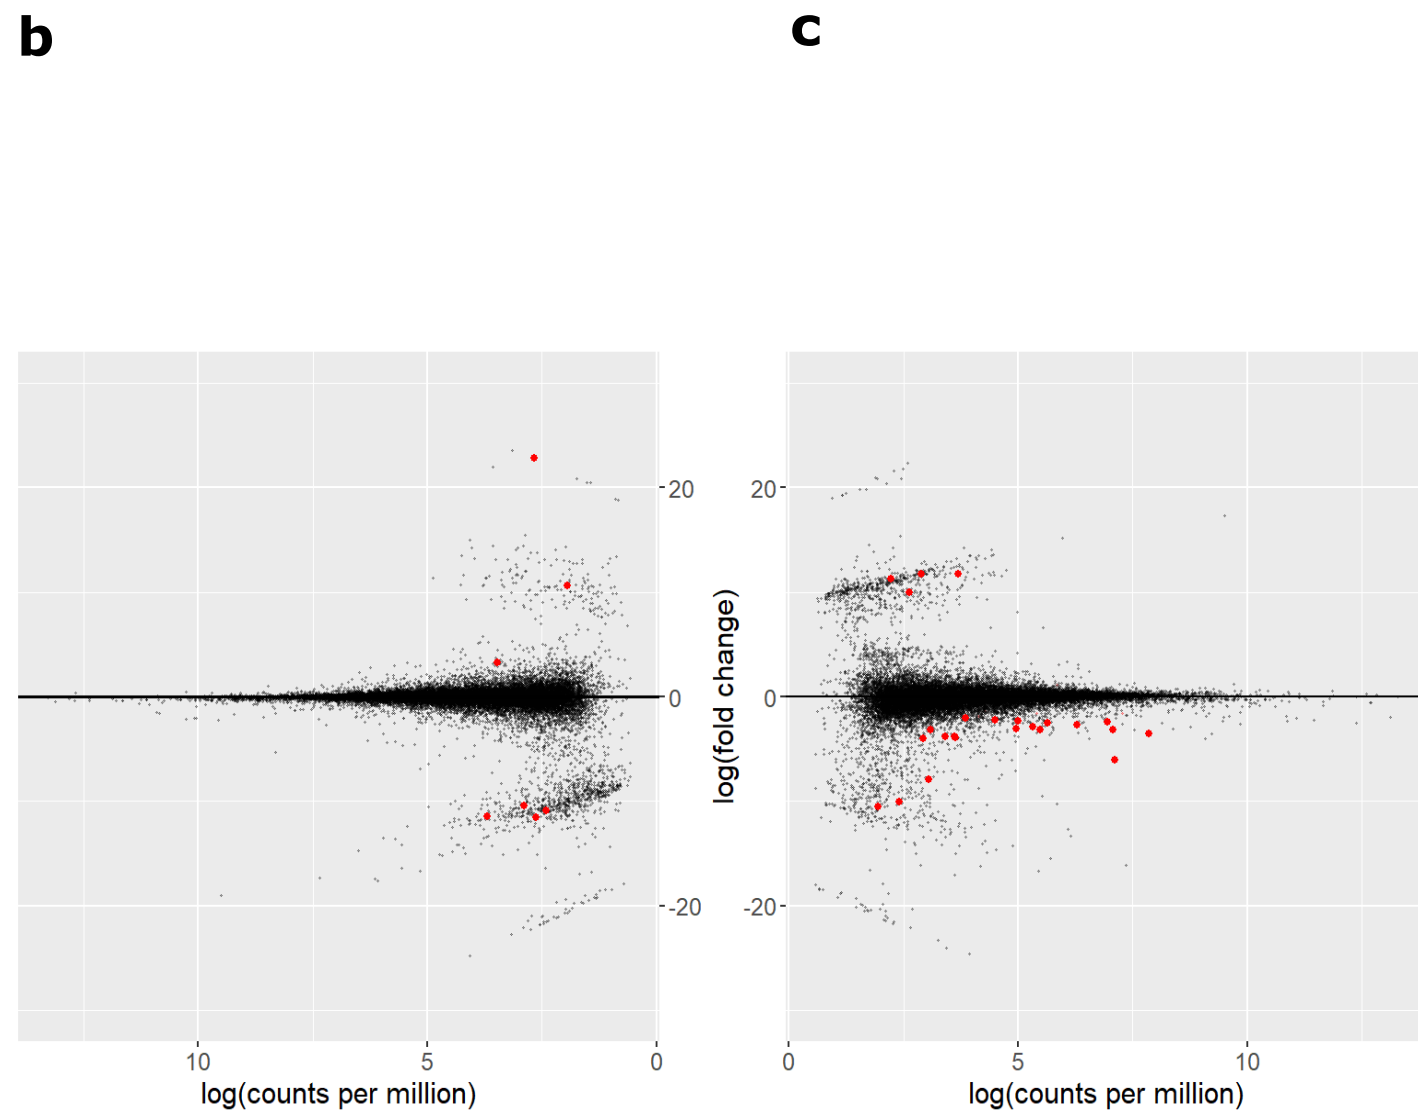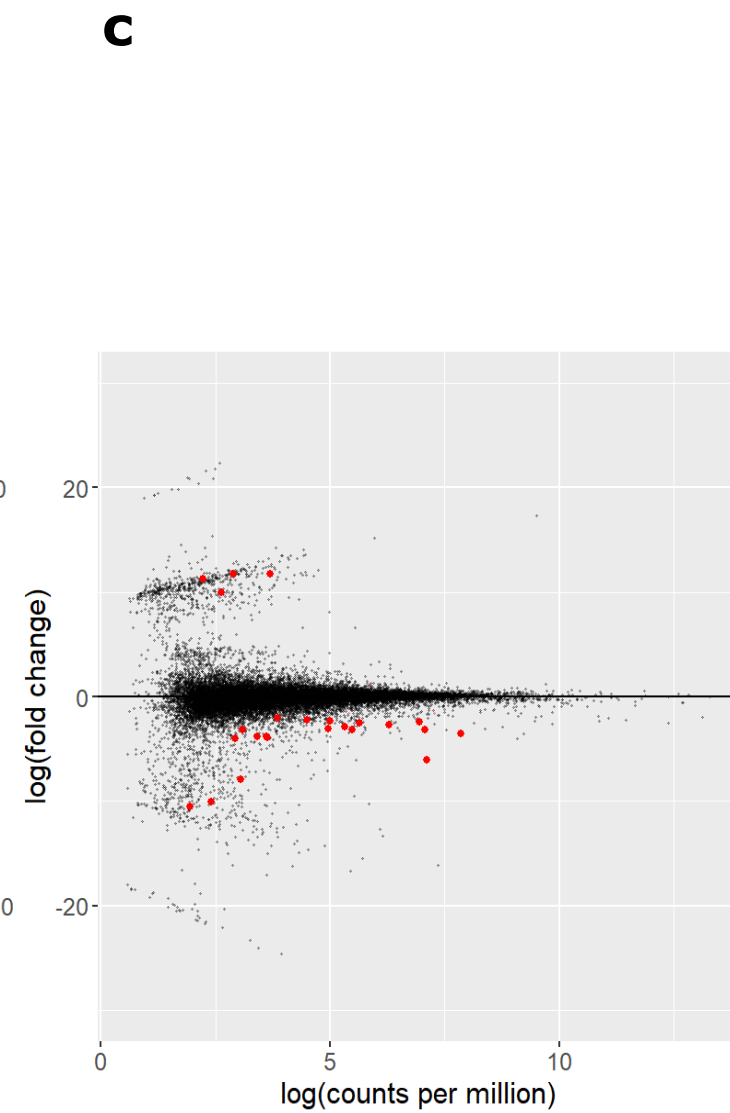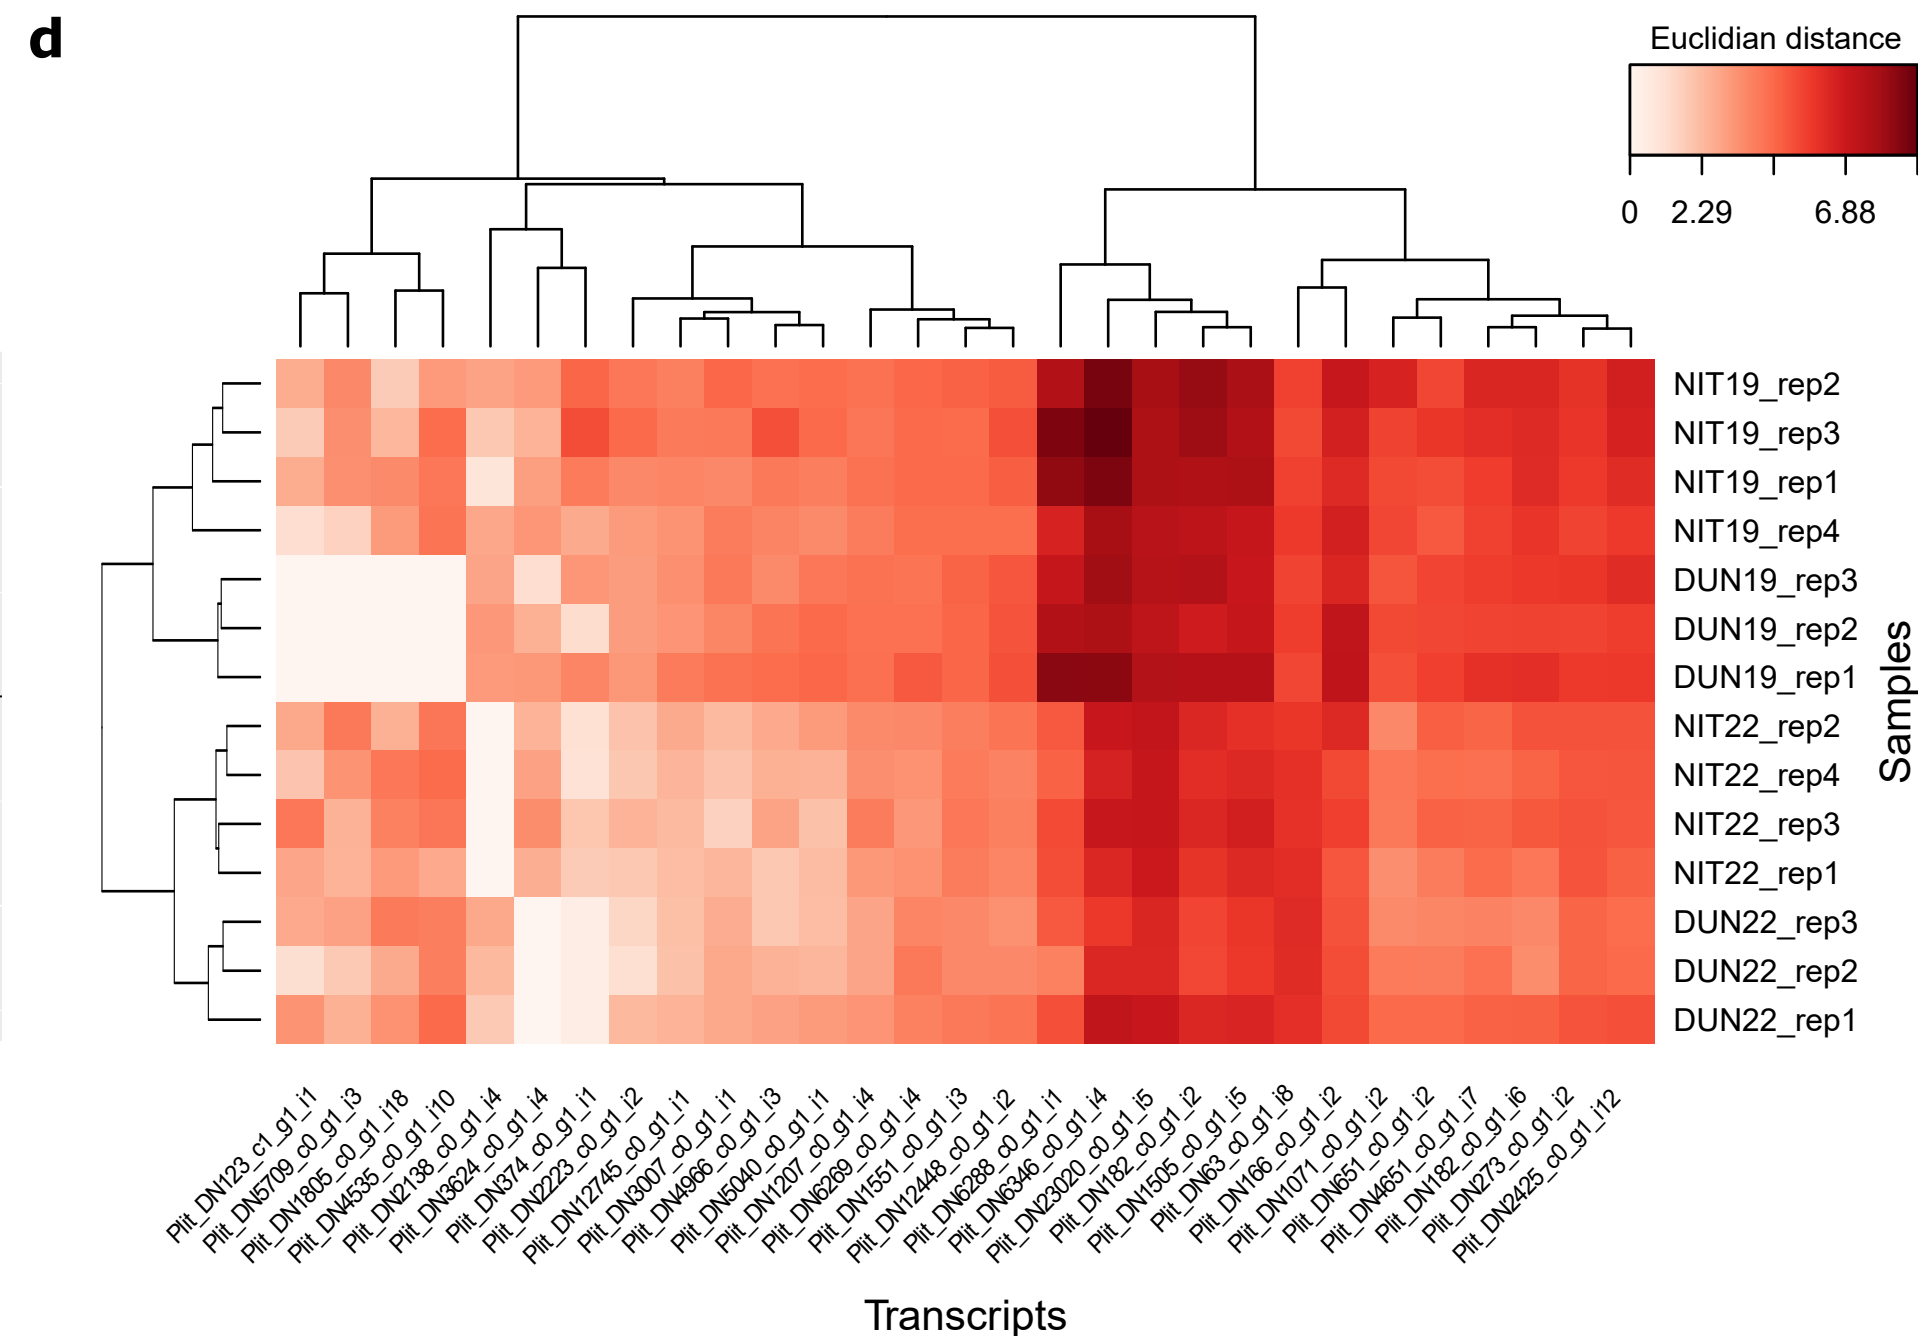

**a**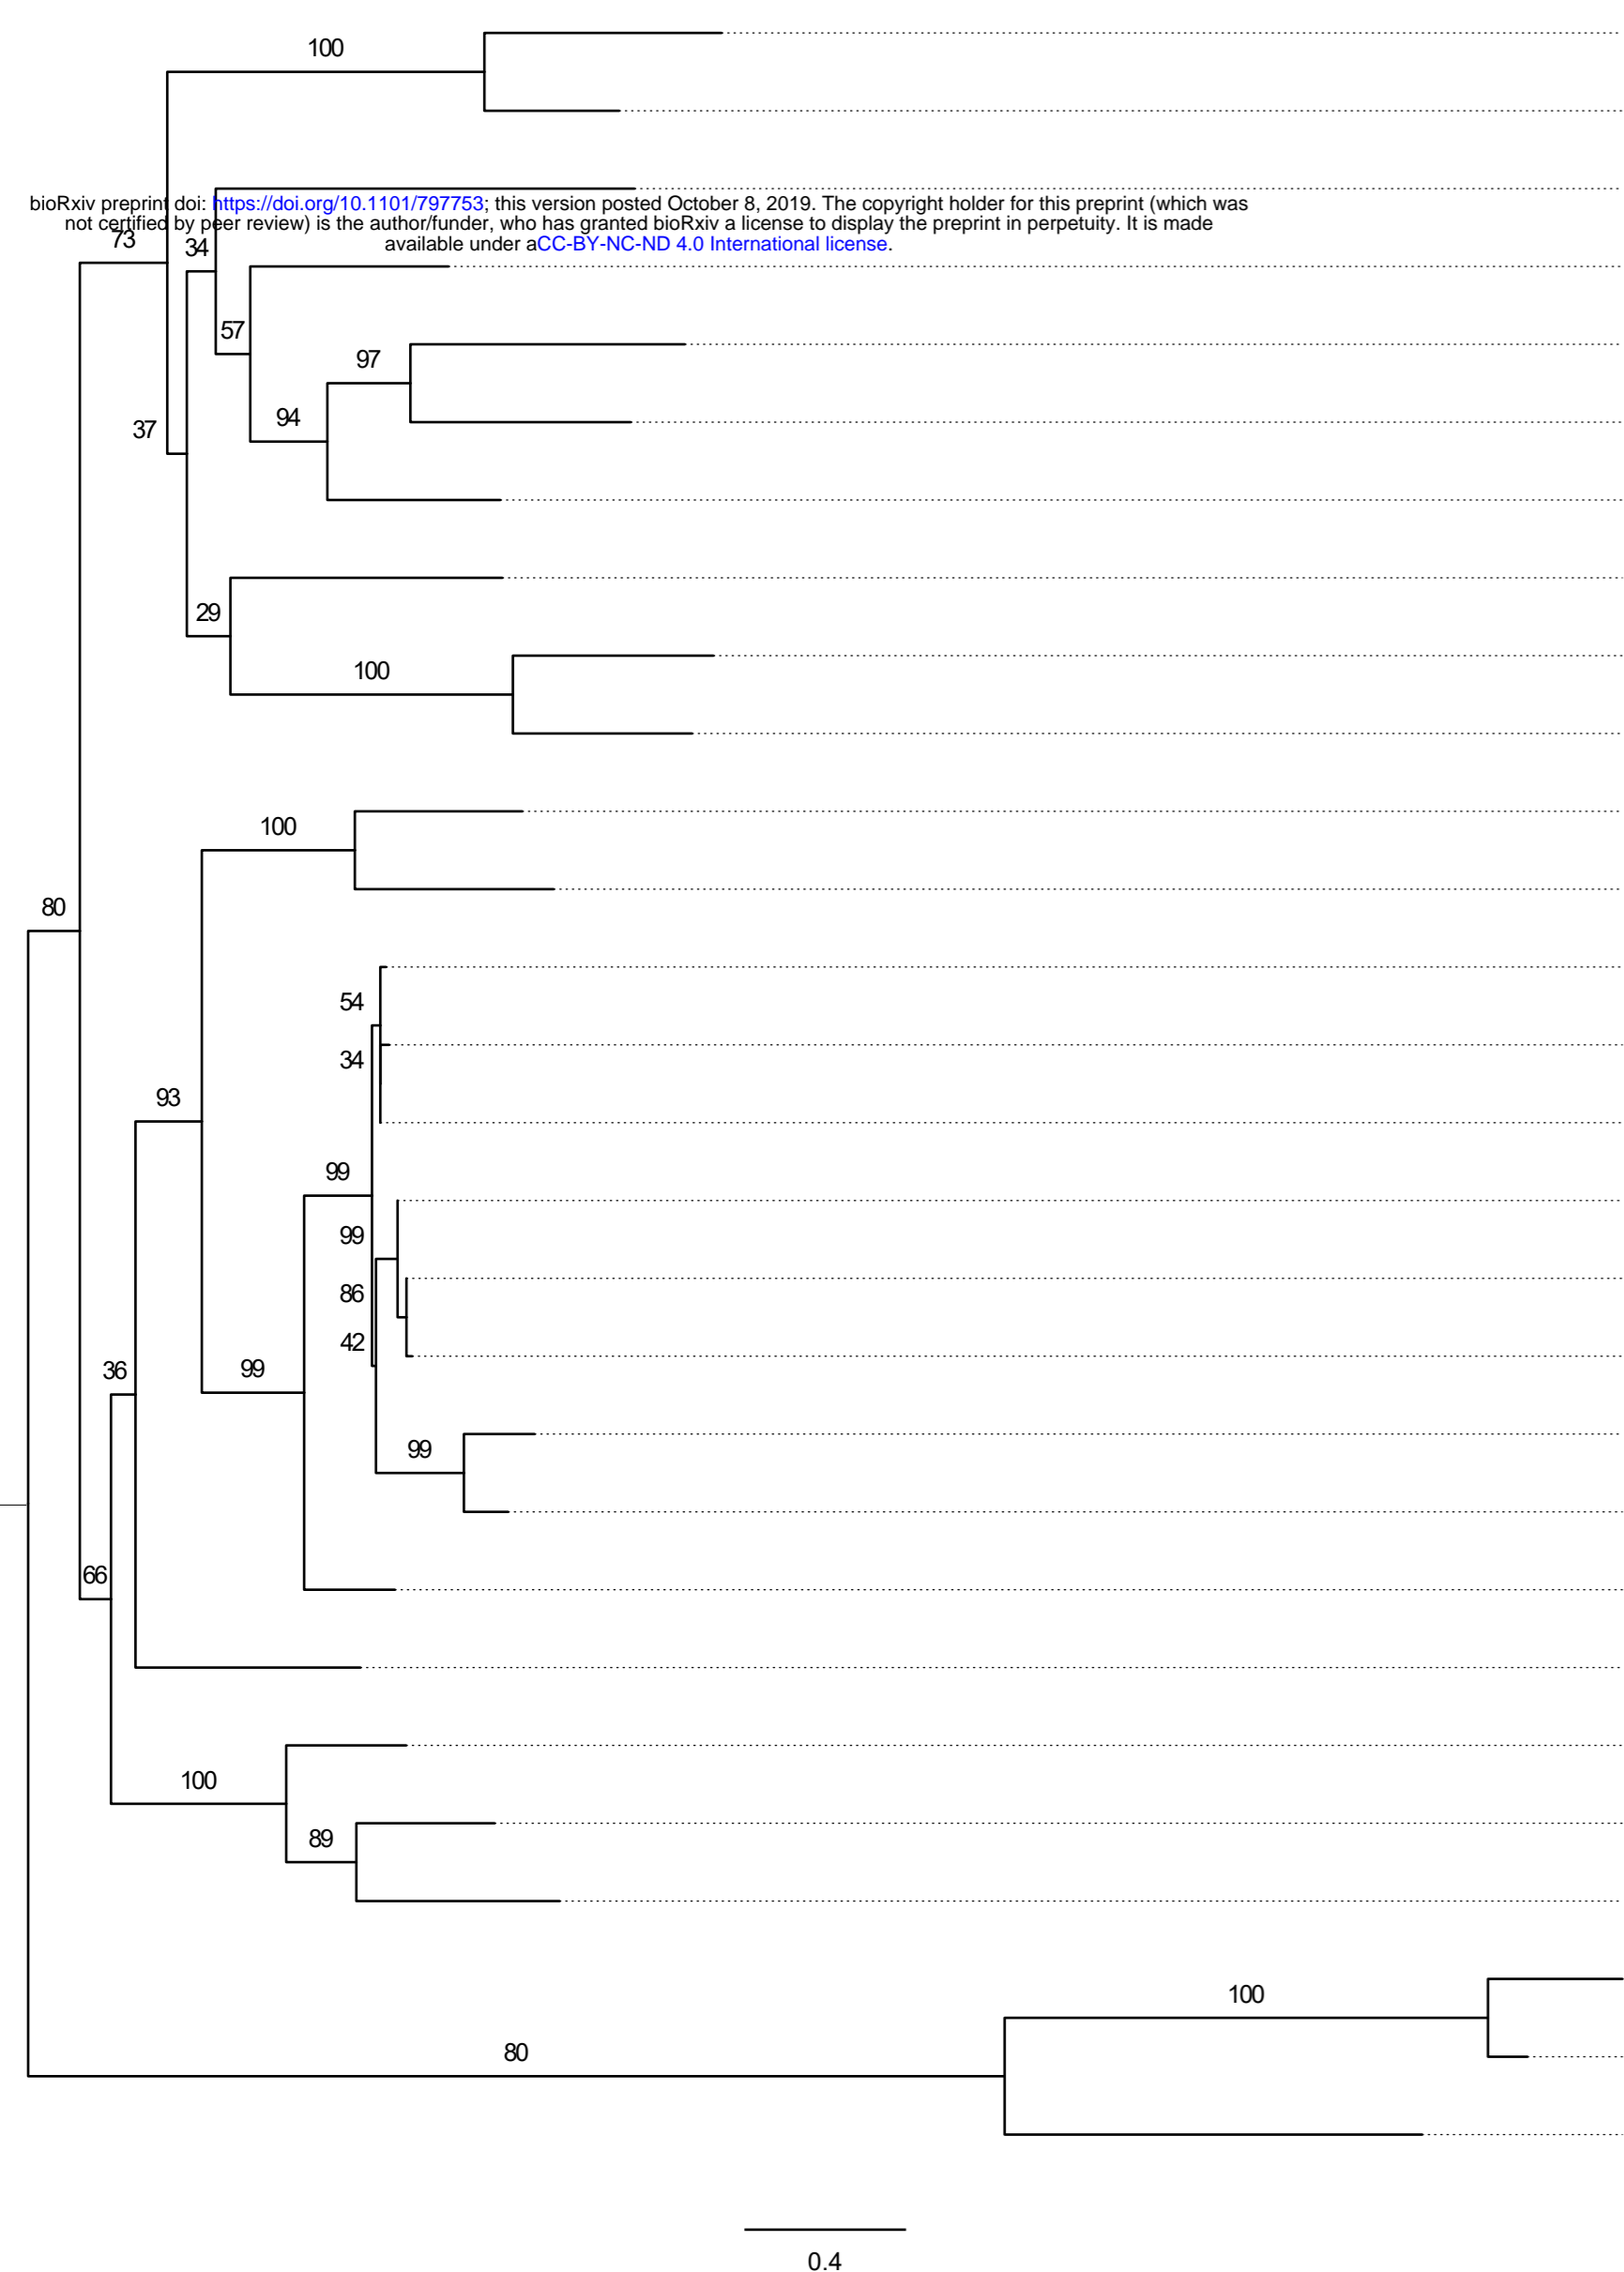

*Tigriopus japonicus* KF951027.1  
*Caligus rogercresseyi* BT076498.1  
**front-end desaturase**  
 Plit\_DN53706\_c4\_g1\_i1.p2  
 Plit\_DN71866\_c0\_g1\_i1.p1  
 Plit\_DN86870\_c0\_g1\_i1.p1  
 Plit\_DN68591\_c0\_g1\_i1.p1  
 Plit\_DN34446\_c0\_g1\_i1.p1  
 Plit\_DN73235\_c0\_g1\_i1.p2  
 Plit\_DN8174\_c0\_g1\_i1.p1  
*Macrobrachium nipponense* KU922942.1  
 Plit\_DN62205\_c0\_g1\_i1.p1  
 Plit\_DN72430\_c0\_g3\_i1.p1  
 Plit\_DN14389\_c0\_g2\_i3.p2  
 Plit\_DN14389\_c0\_g2\_i2.p2  
 Plit\_DN14389\_c0\_g2\_i5.p1  
 Plit\_DN14389\_c0\_g2\_i6.p2  
 Plit\_DN14389\_c0\_g2\_i1.p1  
 Plit\_DN14389\_c0\_g2\_i4.p2  
 Plit\_DN7240\_c0\_g1\_i1.p1  
 Plit\_DN7240\_c0\_g2\_i1.p1  
 Plit\_DN14389\_c0\_g1\_i1.p2  
 Plit\_DN62205\_c0\_g2\_i1.p1  
 Plit\_DN98204\_c0\_g1\_i1.p1  
 Plit\_DN2049\_c0\_g1\_i1.p1  
 Plit\_DN24604\_c0\_g1\_i1.p1  
*Caligus rogercresseyi* BT076296.1  
**ω-end desaturase**  
*Lepeophtheirus salmonis* KY658239.1  
**ω-end desaturase**  
*Hydra vulgaris* CDG71582.1

**b**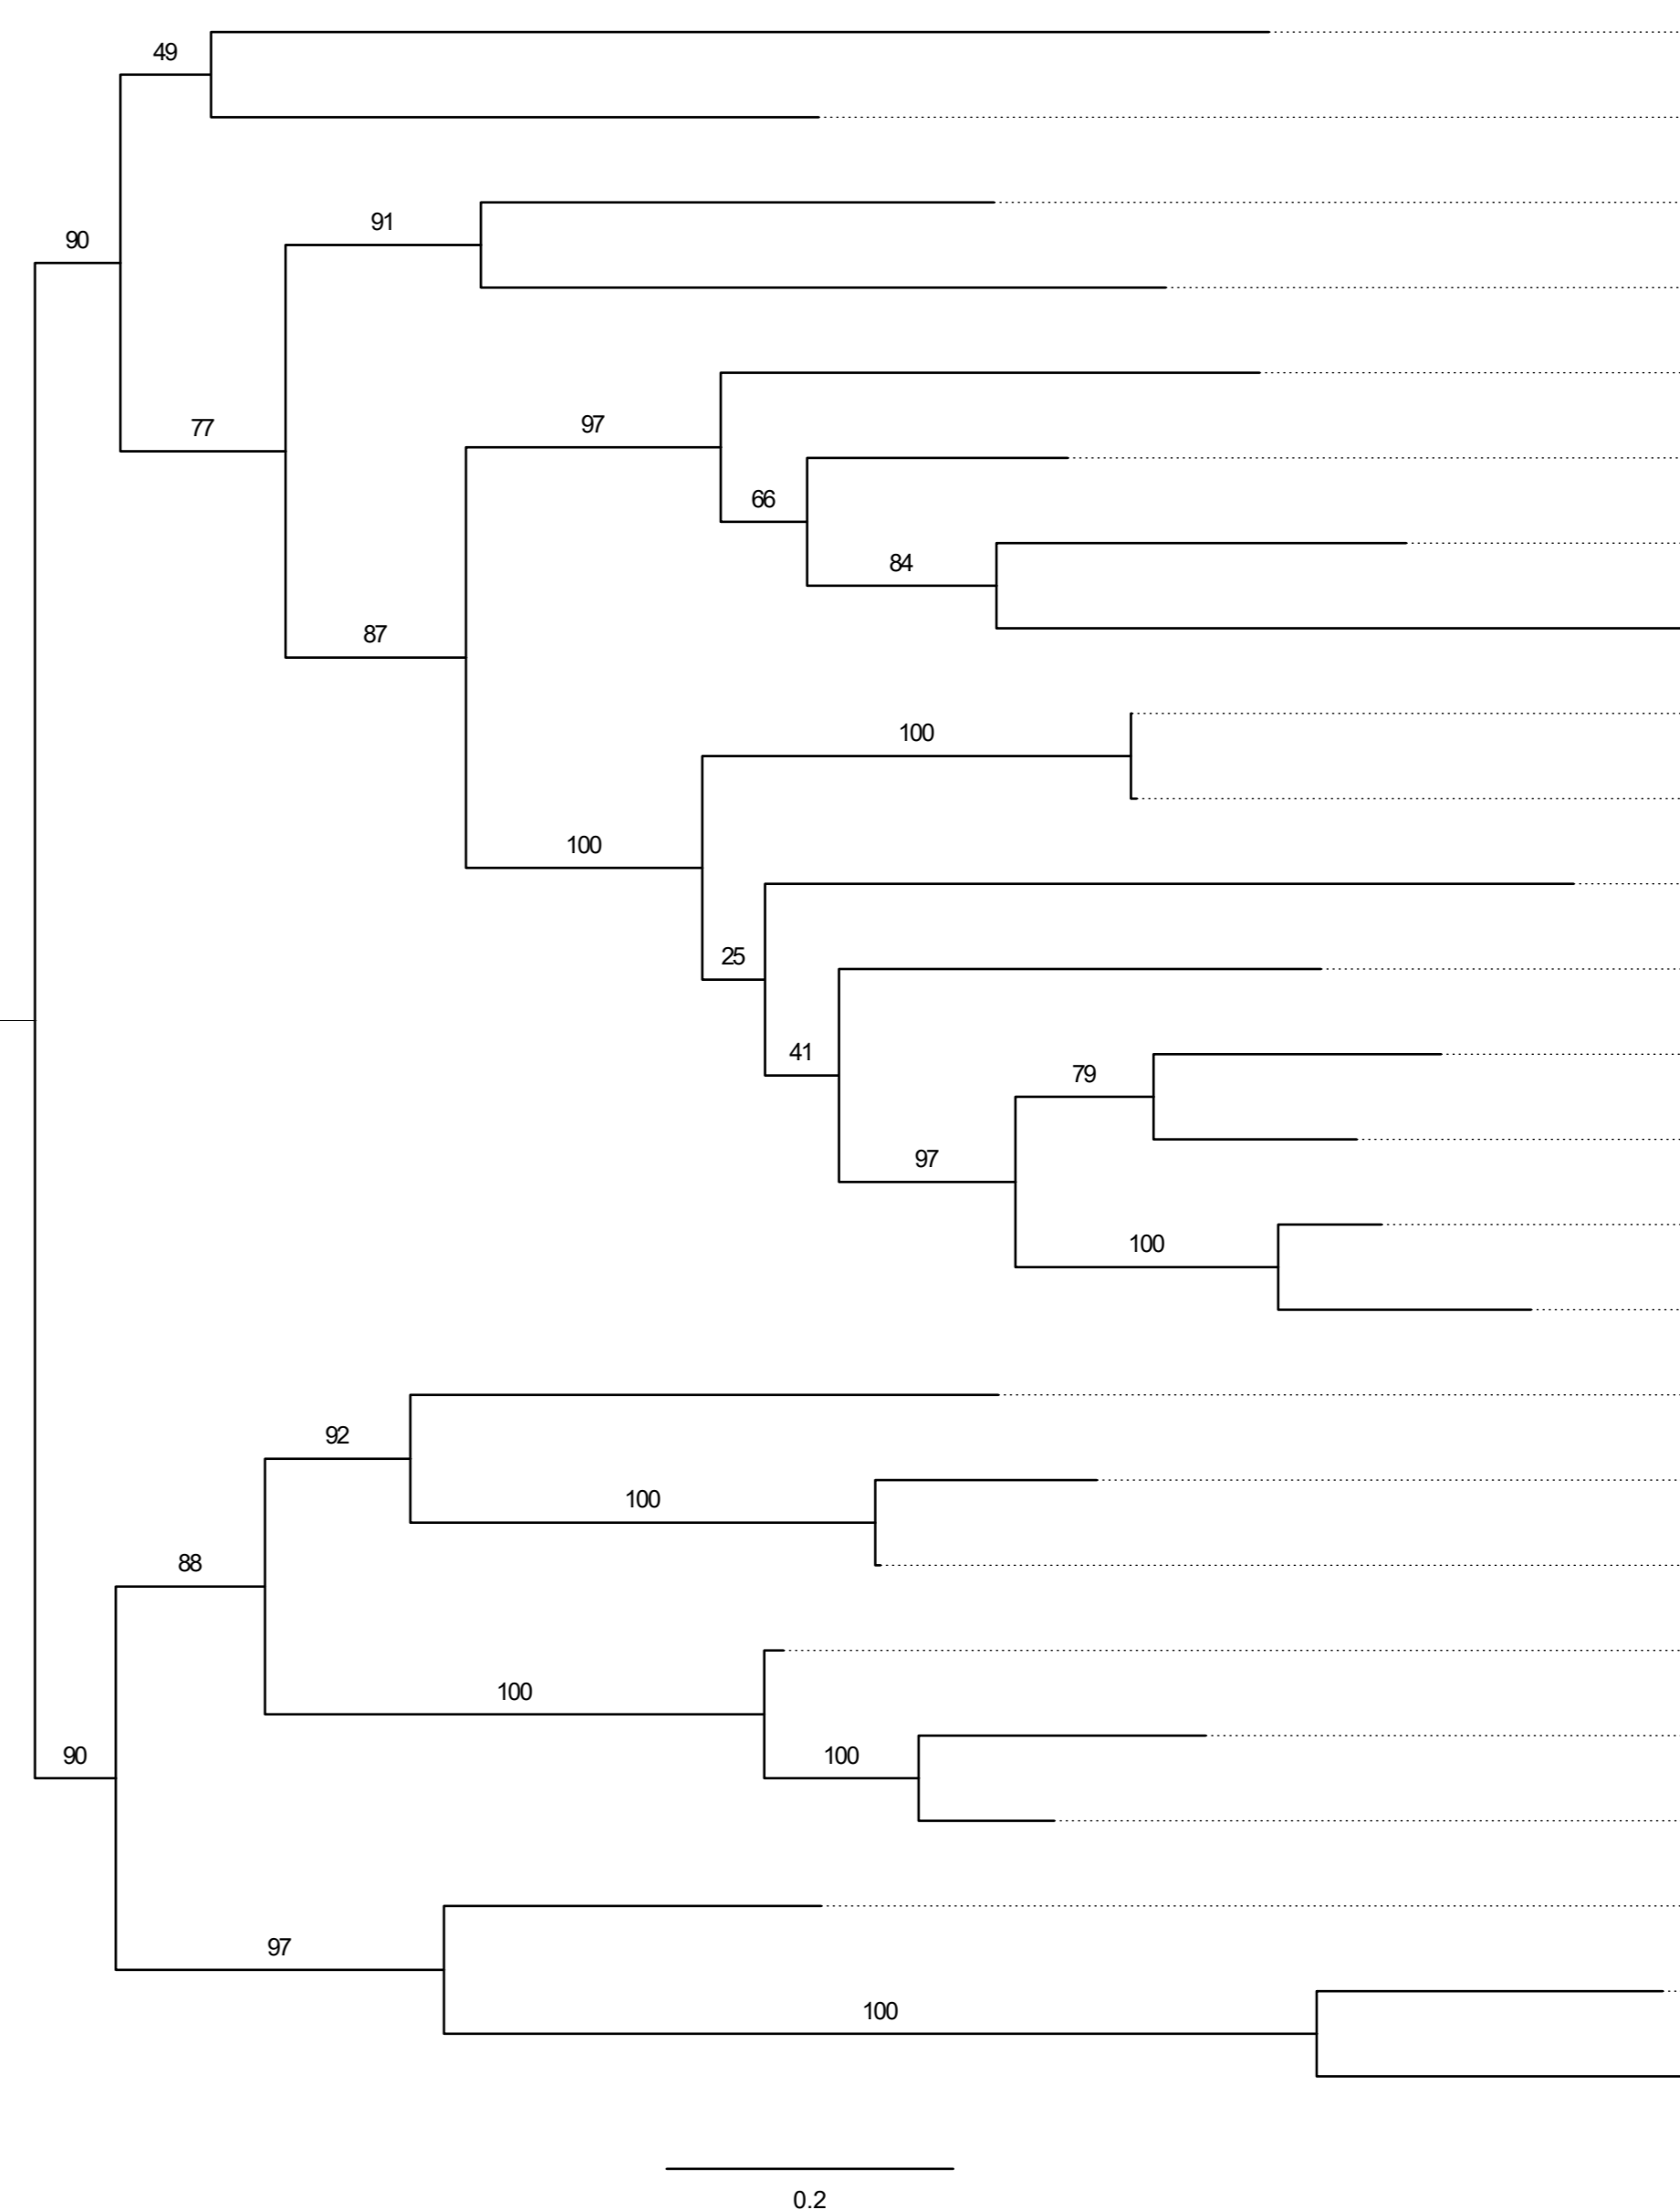

Plit\_DN4058\_c0\_g1\_i1.p2  
 Plit\_DN51649\_c0\_g1\_i1.p3  
 Plit\_DN33450\_c0\_g3\_i1.p1  
 Plit\_DN48397\_c0\_g1\_i1.p1  
 Plit\_DN72481\_c0\_g1\_i1.p1  
*Scylla paramamosain* KX454537.1  
**Elov14-like**  
*Daphnia magna* KZS12713.1  
*Hydra vulgaris* HAAD01001256.1  
**Elov14-like**  
 Plit\_DN2897\_c0\_g1\_i3.p1  
 Plit\_DN2897\_c0\_g1\_i6.p1  
*Scylla olivacea* MF416221.1  
**Elov17-like**  
*Daphnia magna* KZS11353.1  
**Elov15-like**  
 Plit\_DN8396\_c0\_g1\_i3.p1  
 Plit\_DN1296\_c0\_g1\_i1.p1  
*Caligus rogercresseyi* BT076206.1  
*Lepeophtheirus salmonis* BT078466.1  
 Plit\_DN23280\_c0\_g1\_i1.p1  
 Plit\_DN24621\_c0\_g1\_i1.p1  
 Plit\_DN24621\_c0\_g1\_i2.p1  
 Plit\_DN26061\_c0\_g2\_i1.p1  
 Plit\_DN195747\_c0\_g1\_i1.p1  
 Plit\_DN26061\_c0\_g1\_i1.p1  
 Plit\_DN210747\_c0\_g1\_i1.p2  
*Daphnia magna* KZS16038.1  
**Elov16-like**  
 Plit\_DN8575\_c0\_g1\_i4.p1
